# Supplementary material for: Discovery of New 3,3-Diethylazetidine-2,4-dione Based Thiazoles as Nanomolar Human Neutrophil Elastase Inhibitors with Broad-Spectrum Antiproliferative Activity
Source: MDPI journal article supplement (doi:10.3390/ijms23147566), 2022-07-08

## Supporting Information

### Discovery of new 3,3-diethylazetidine-2,4-dione based thiazoles as nanomolar human neutrophil elastase inhibitors with broad-spectrum antiproliferative activity

Beata Donarska <sup>1</sup>, Marta Świtalska <sup>2</sup>, Joanna Wietrzyk <sup>2</sup>, Wojciech Plaziński <sup>3,4</sup>, Magdalena Mizerska-Kowalska <sup>5</sup>, Barbara Zdzisińska <sup>5</sup>, Krzysztof Z. Łączkowski <sup>1,\*</sup>

<sup>1</sup>Department of Chemical Technology and Pharmaceuticals, Faculty of Pharmacy, Collegium Medicum, Nicolaus Copernicus University, Jurasza 2, 85-089 Bydgoszcz, Poland,

<sup>2</sup>Hirszfeld Institute of Immunology and Experimental Therapy, Polish Academy of Sciences, Rudolfa Weigla 12, 53-114 Wrocław, Poland,

<sup>3</sup>Jerzy Haber Institute of Catalysis and Surface Chemistry, Polish Academy of Sciences, Niezapominajek 8, 30-239, Cracow, Poland,

<sup>4</sup>Department of Biopharmacy, Medical University of Lublin, Chodzki 4a, 20-093 Lublin, Poland,

<sup>5</sup>Department of Virology and Immunology, Faculty of Biology and Biotechnology, Maria Curie-Skłodowska University, Akademicka 19 Street, 20-033 Lublin, Poland

\*Corresponding author: Krzysztof Z. Łączkowski, e-mail: krzysztof.laczkowski@cm.umk.pl

## Contents

1. Curves for the determination of IC<sub>50</sub> values for inhibition of HNE activity of compounds **3a-3j** and sivelestat (Figures S1–S11).
2. Curves for the determination of IC<sub>50</sub> values of antiproliferative activity of compounds **3a-3j** (Figures S12–S16).
3. <sup>1</sup>H, <sup>13</sup>C NMR and HRMS spectra of compounds **2** and **3a-3j**.

**Figure S1.** Curves for the determination of IC<sub>50</sub> values for inhibition of HNE activity of compound **3a**.

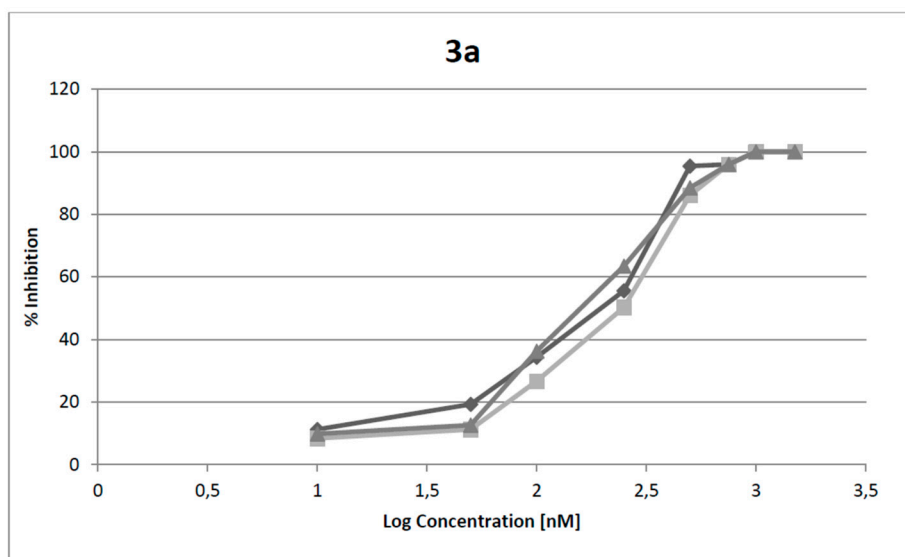

**Figure S2.** Curves for the determination of  $IC_{50}$  values for inhibition of HNE activity of compound **3b**.

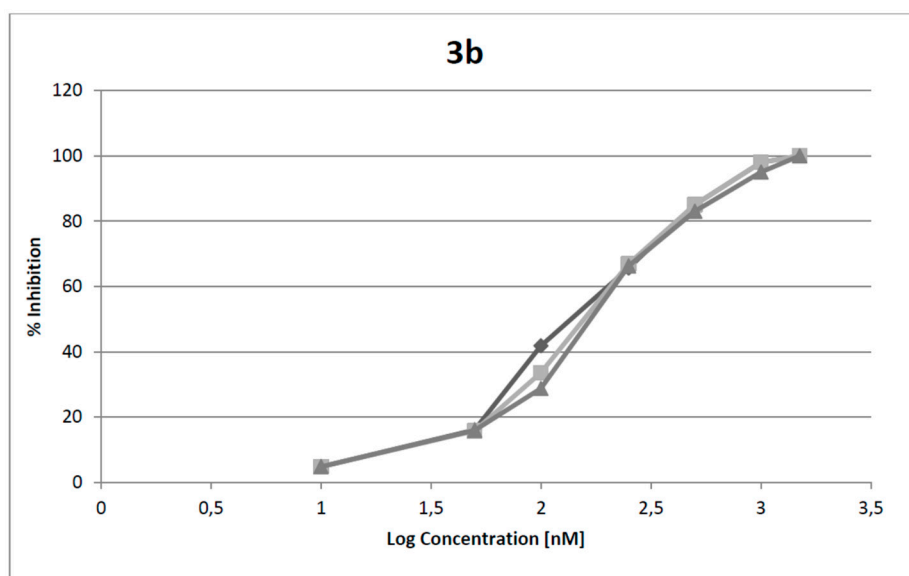

**Figure S3.** Curves for the determination of  $IC_{50}$  values for inhibition of HNE activity of compound **3c**.

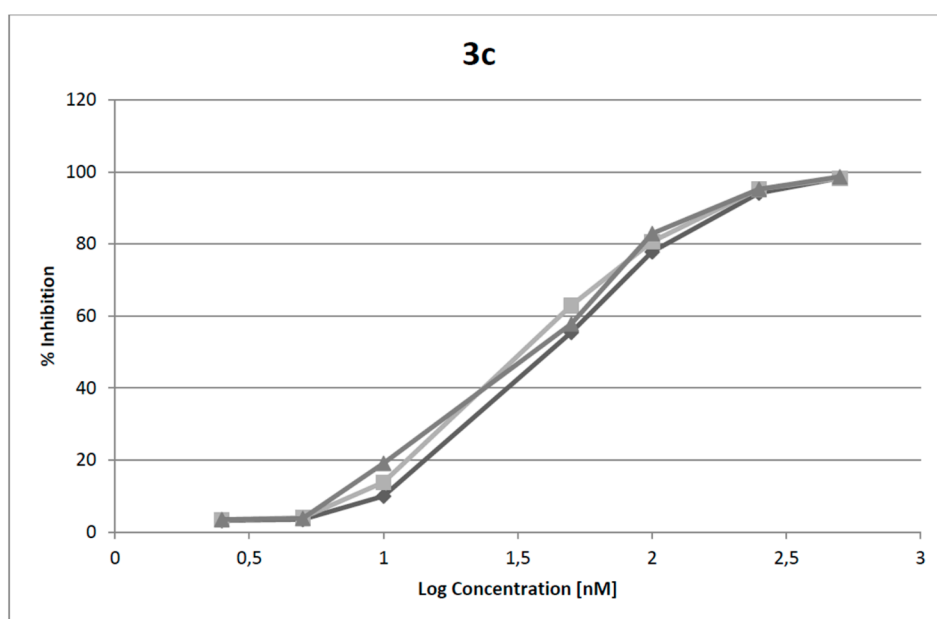

**Figure S4.** Curves for the determination of  $IC_{50}$  values for inhibition of HNE activity of compound **3d**.

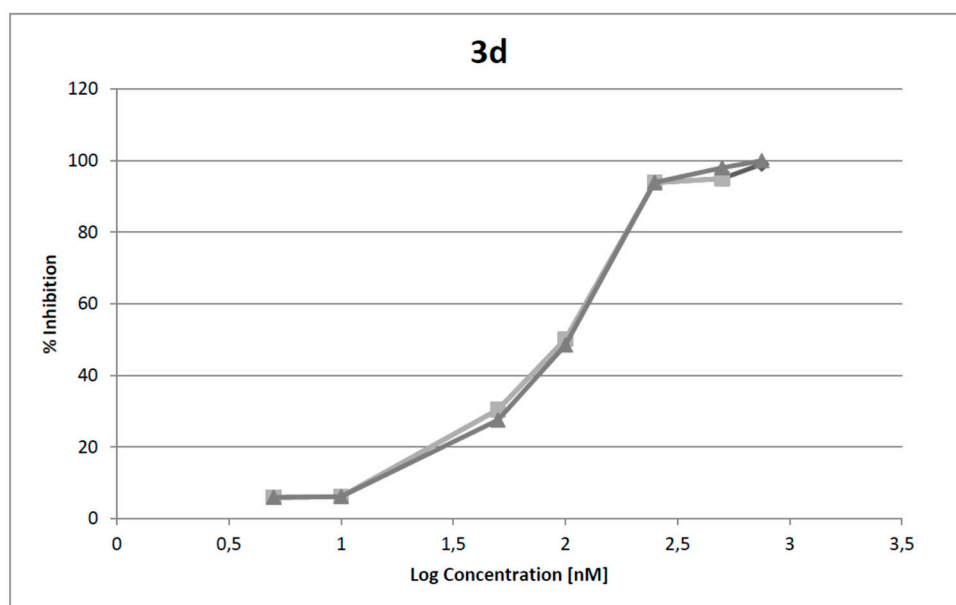

**Figure S5.** Curves for the determination of  $IC_{50}$  values for inhibition of HNE activity of compound **3e**.

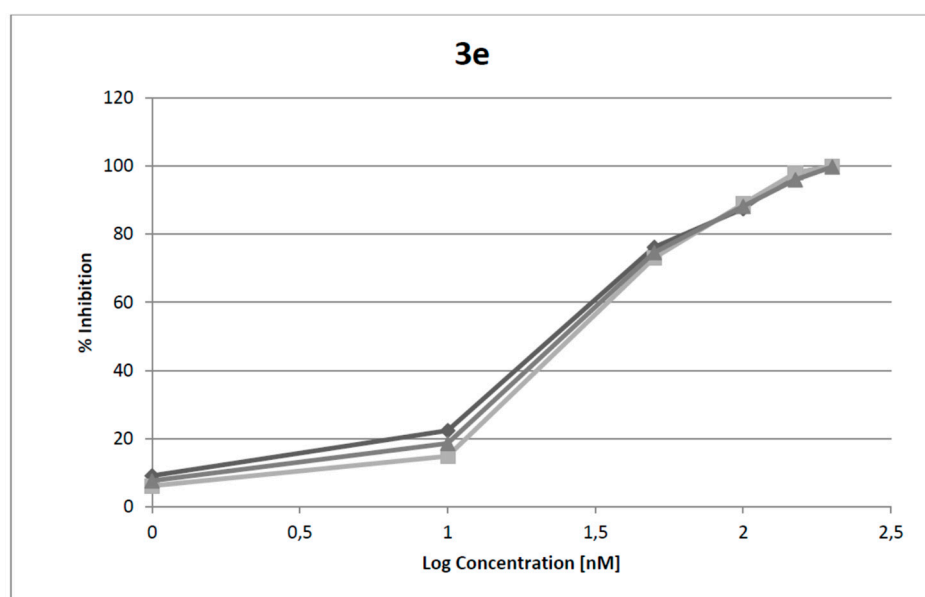

**Figure S6.** Curves for the determination of  $IC_{50}$  values for inhibition of HNE activity of compound **3f**.

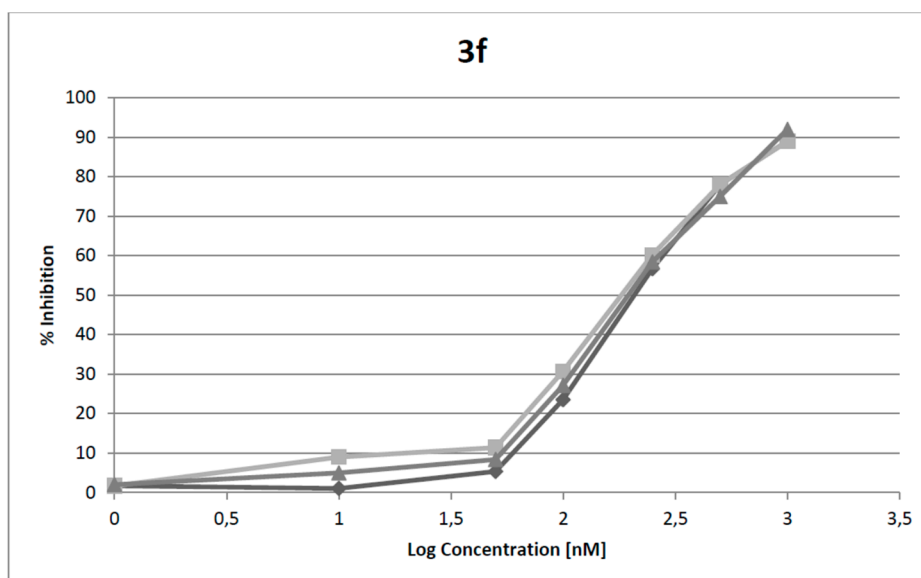

**Figure S7.** Curves for the determination of  $IC_{50}$  values for inhibition of HNE activity of compound **3g**.

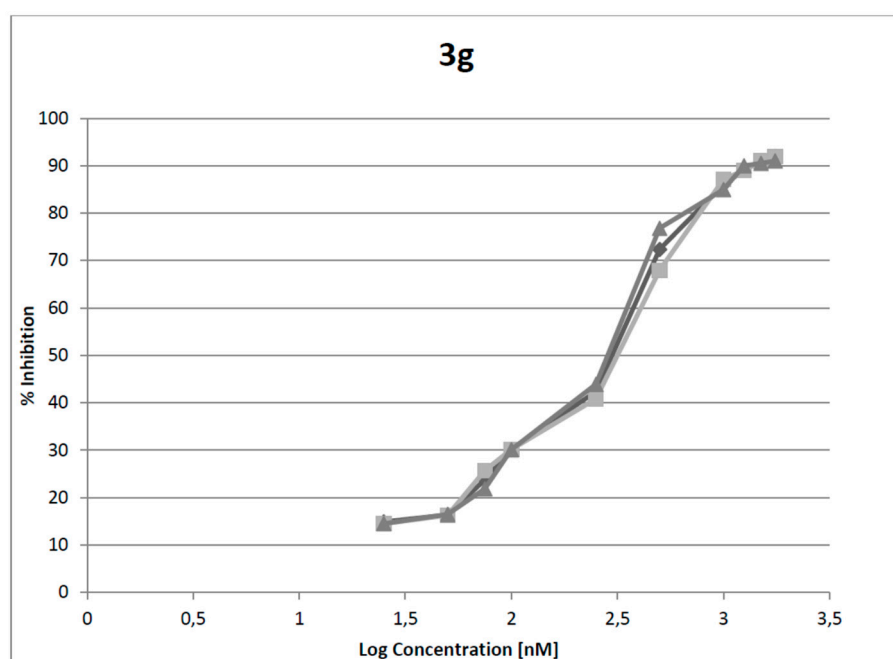

**Figure S8.** Curves for the determination of  $IC_{50}$  values for inhibition of HNE activity of compound **3h**.

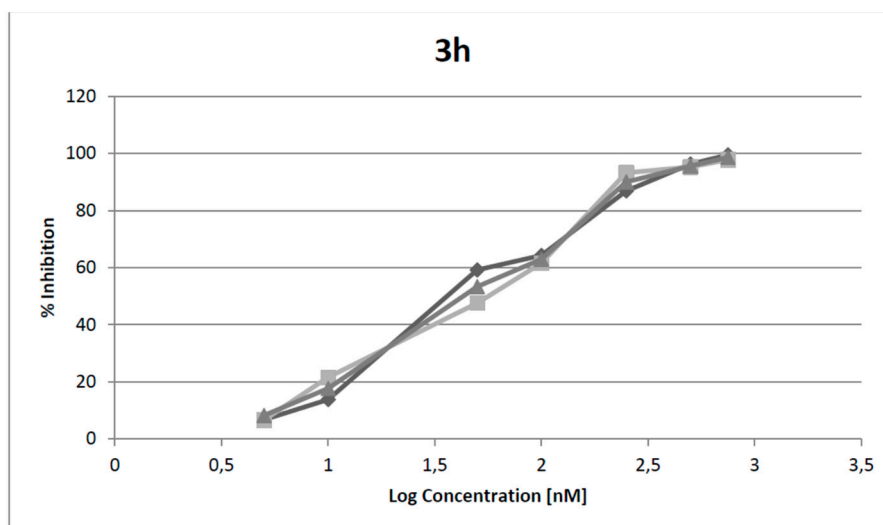

**Figure S9.** Curves for the determination of  $IC_{50}$  values for inhibition of HNE activity of compound **3i**.

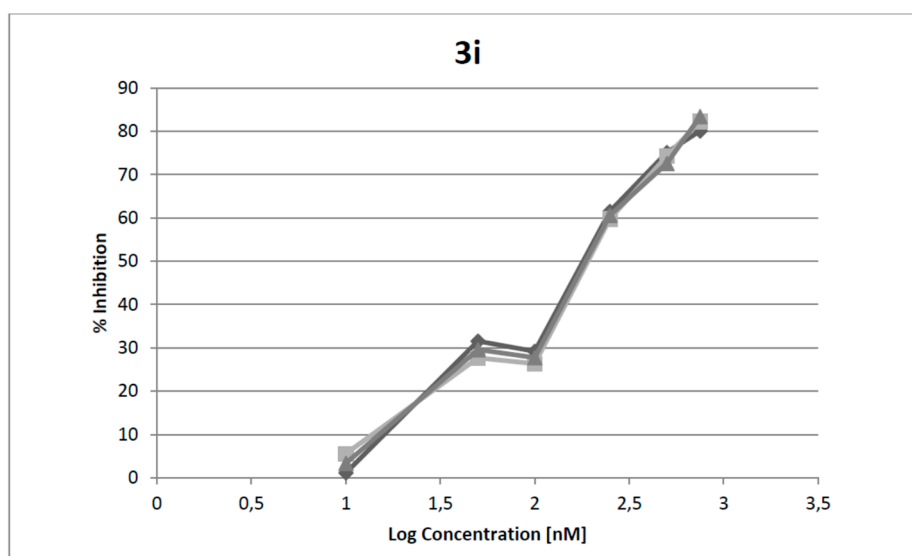

**Figure S10.** Curves for the determination of  $IC_{50}$  values for inhibition of HNE activity of compound **3j**.

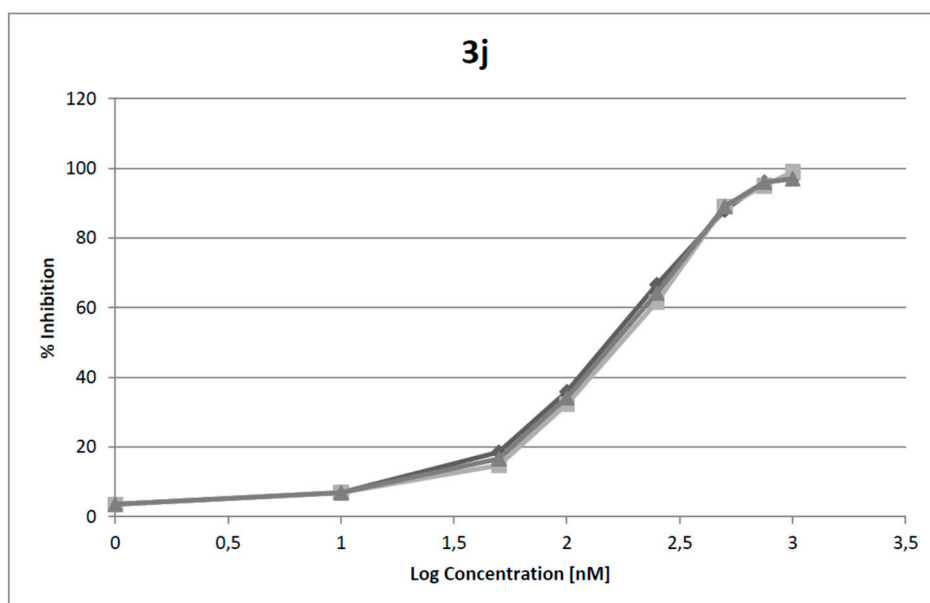

**Figure S11.** Curves for the determination of  $IC_{50}$  values for inhibition of HNE activity of sivelestat.

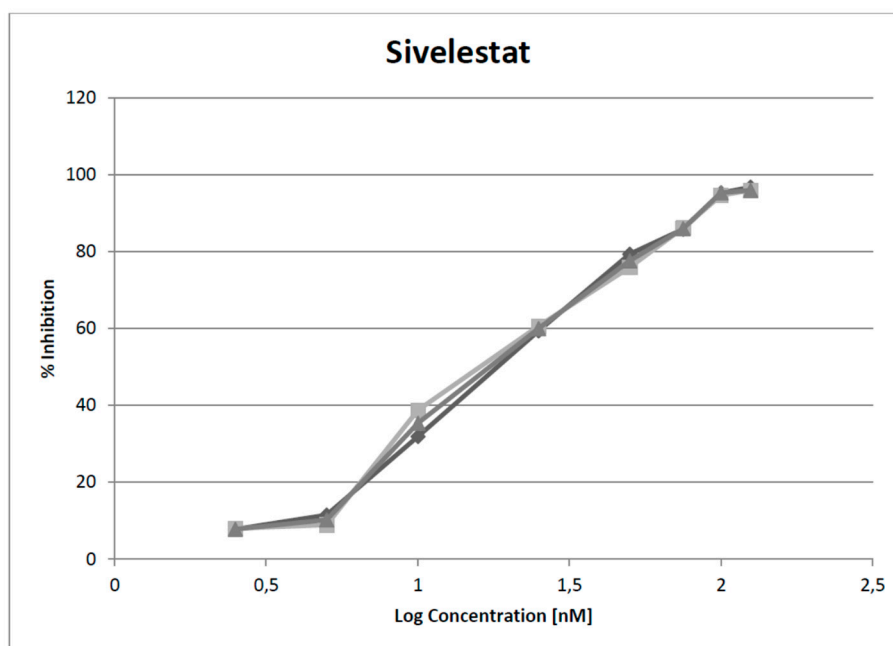

IC<sub>50</sub> values obtained in [μg/ml] have been converted to [μM] values in the manuscript.

**Figure S12.** Curves for the determination of IC<sub>50</sub> values of antiproliferative activity of compounds **3a-3j** for MV4-11 cancer cell line.

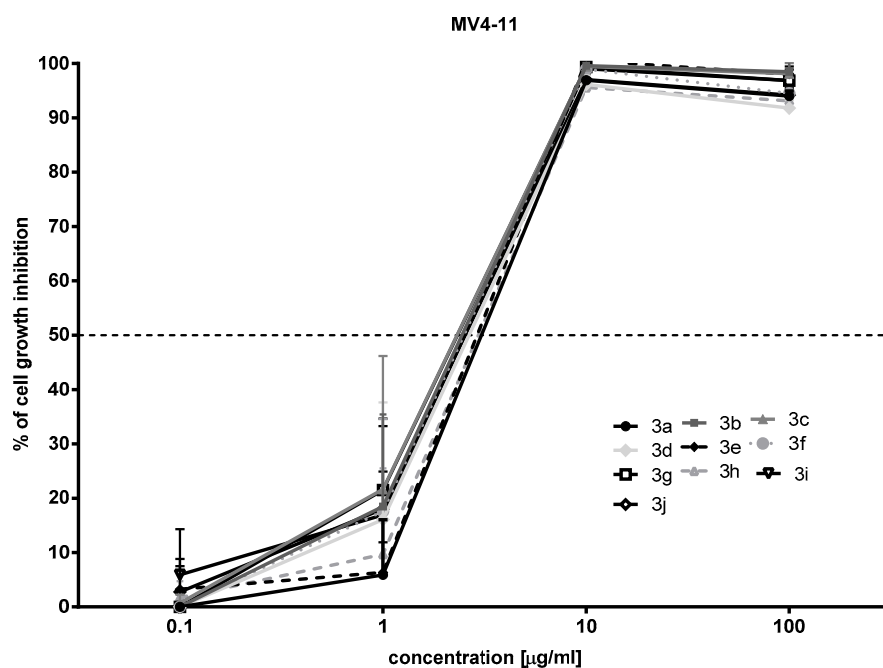

**Figure S13.** Curves for the determination of IC<sub>50</sub> values of antiproliferative activity of compounds **3a-3j** for UMUC-3 cancer cell line.

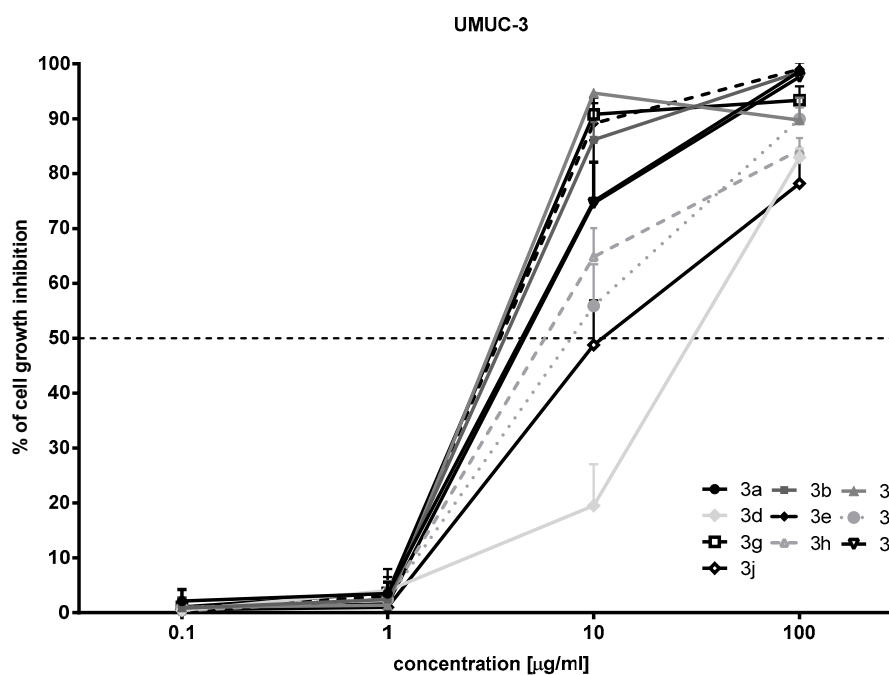

**Figure S14.** Curves for the determination of IC<sub>50</sub> values of antiproliferative activity of compounds **3a-3j** for MDA-MB-231 cancer cell line.

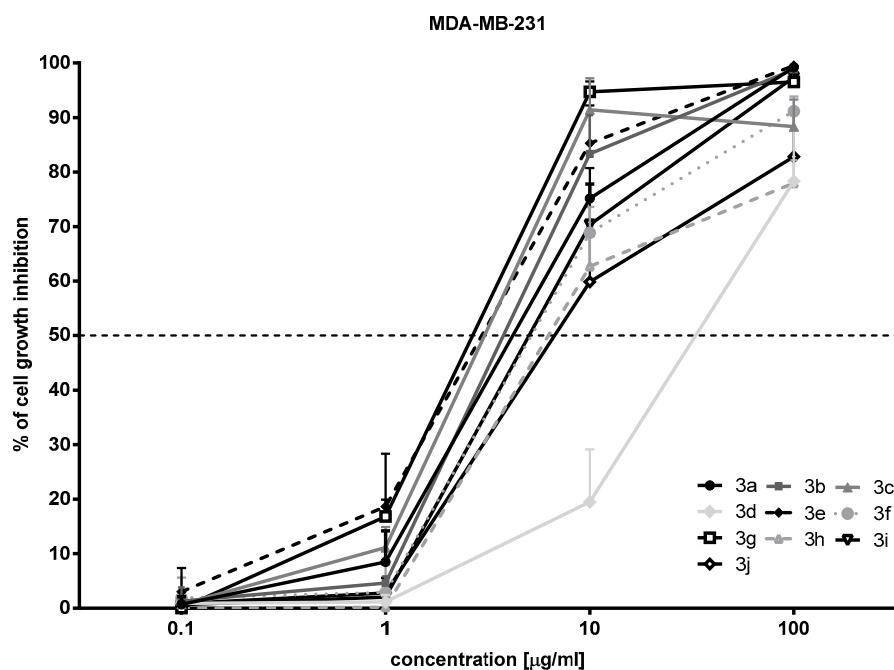

**Figure S15.** Curves for the determination of IC<sub>50</sub> values of antiproliferative activity of compounds **3a-3j** for A549 cancer cell line.

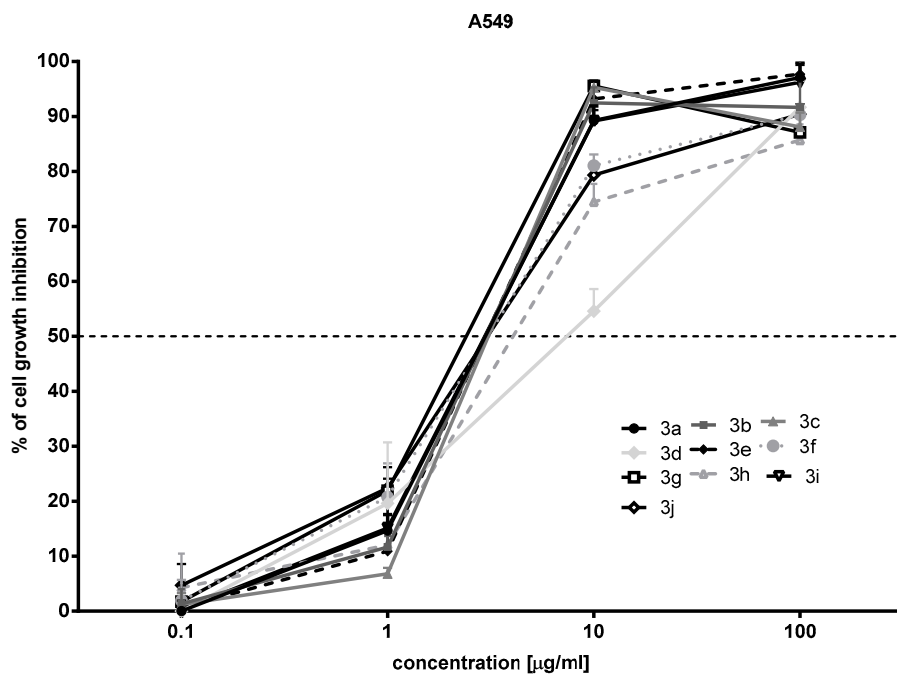



**Figure S16.** Curves for the determination of IC<sub>50</sub> values of antiproliferative activity of compounds **3a-3j** for Balb/3T3 cell line.

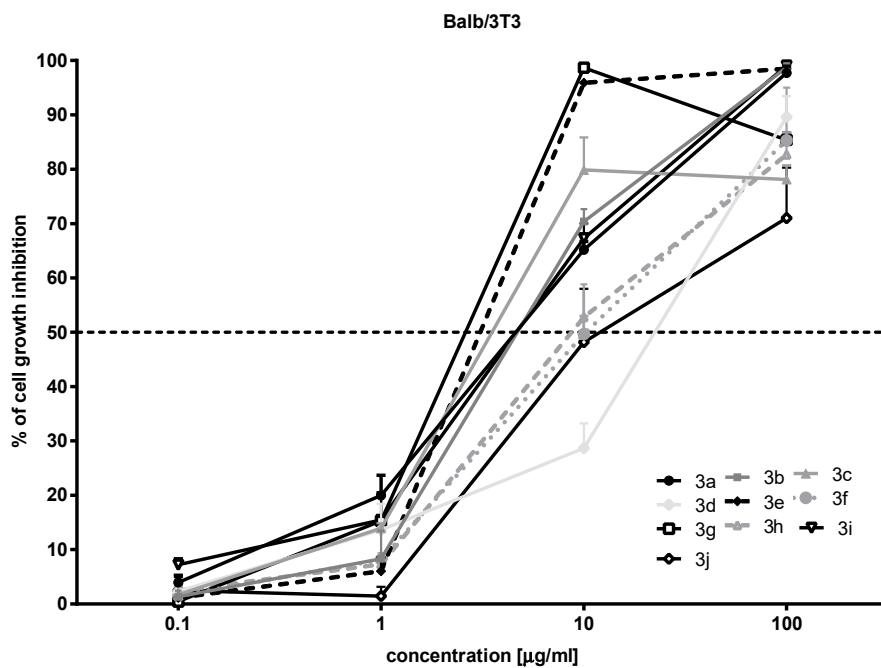

**Substrate 2**

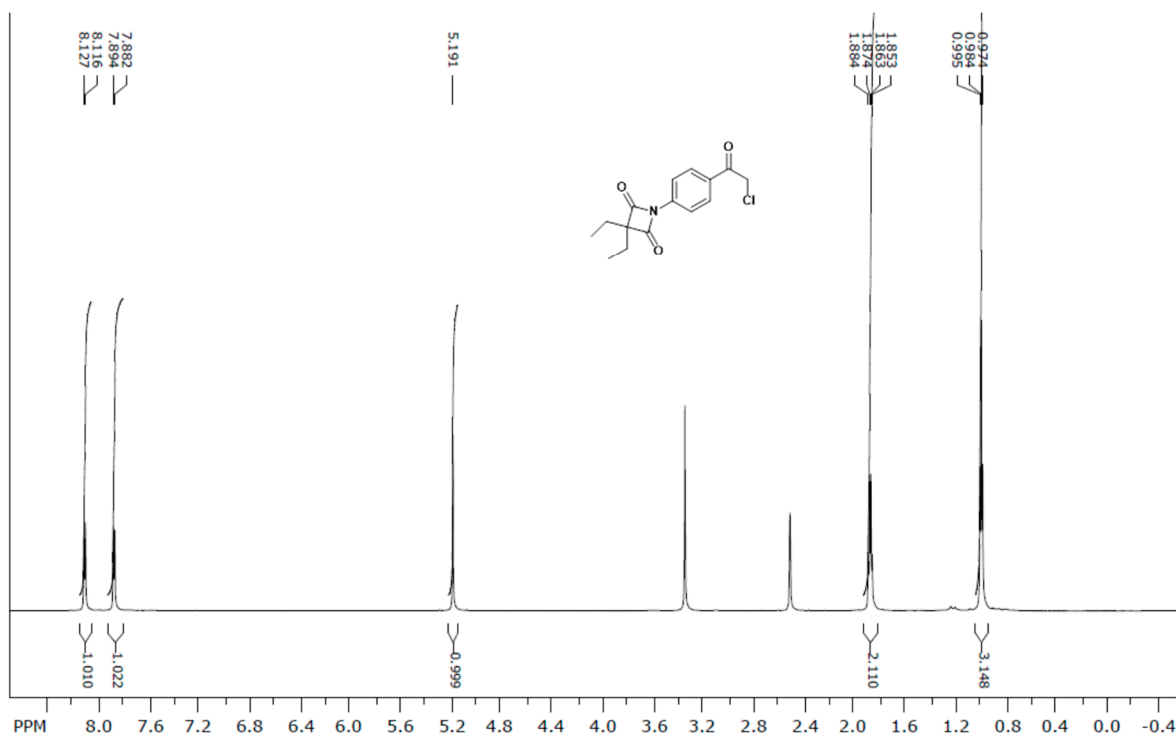

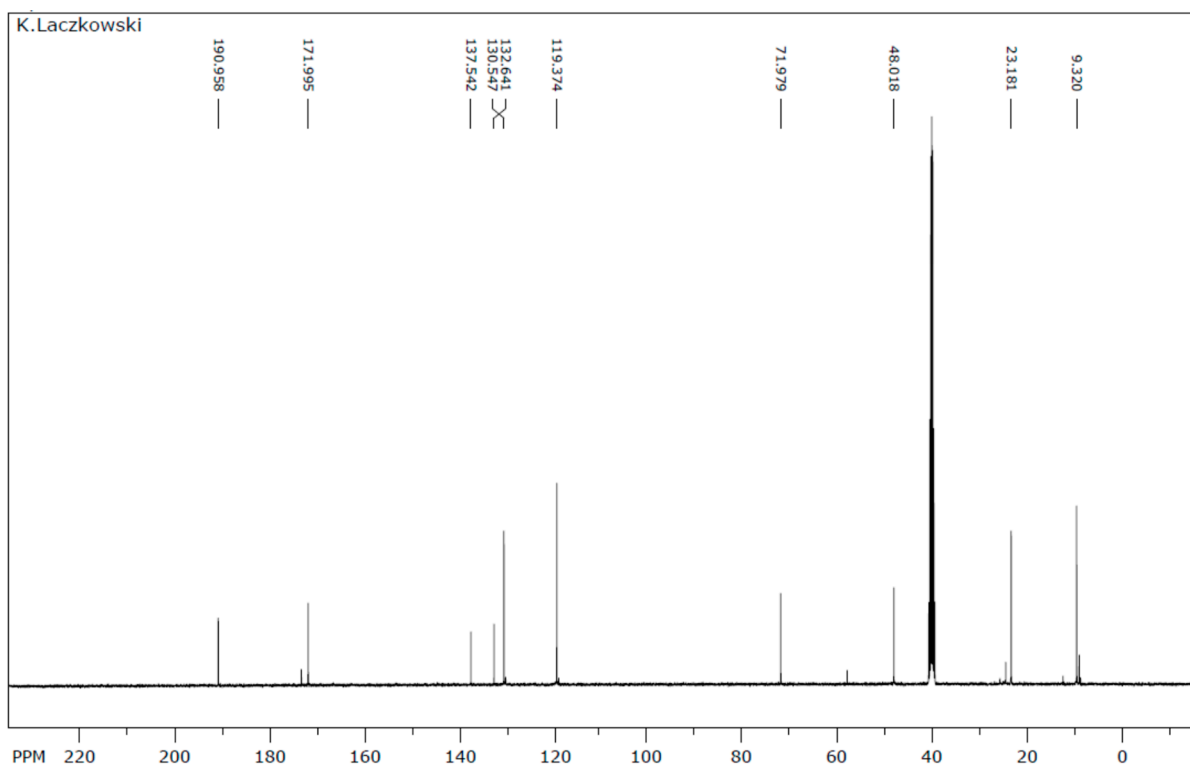

### Product 3a

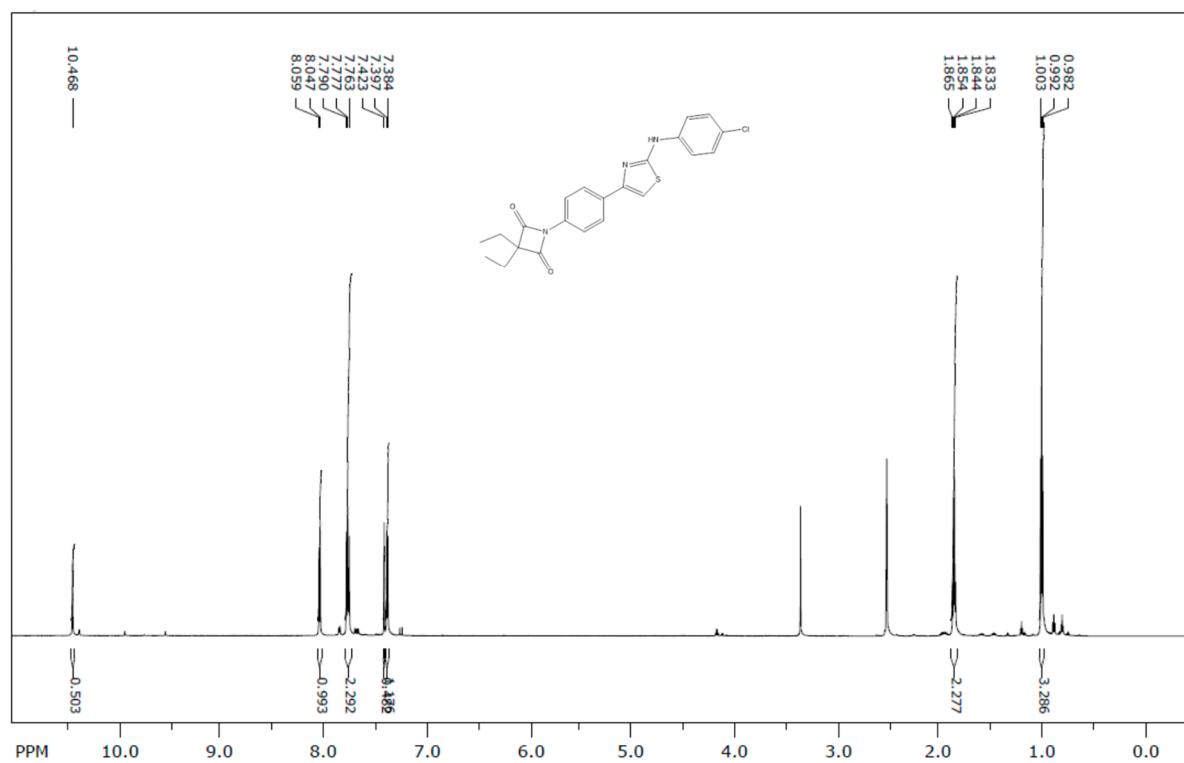

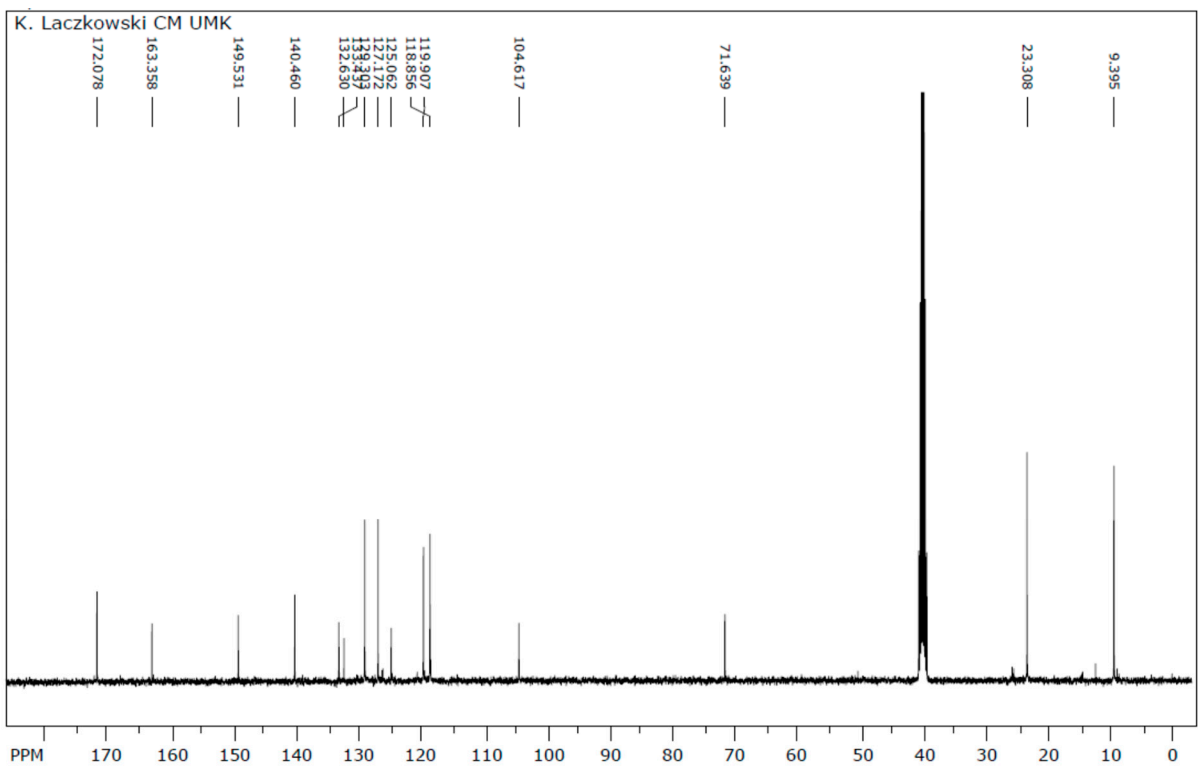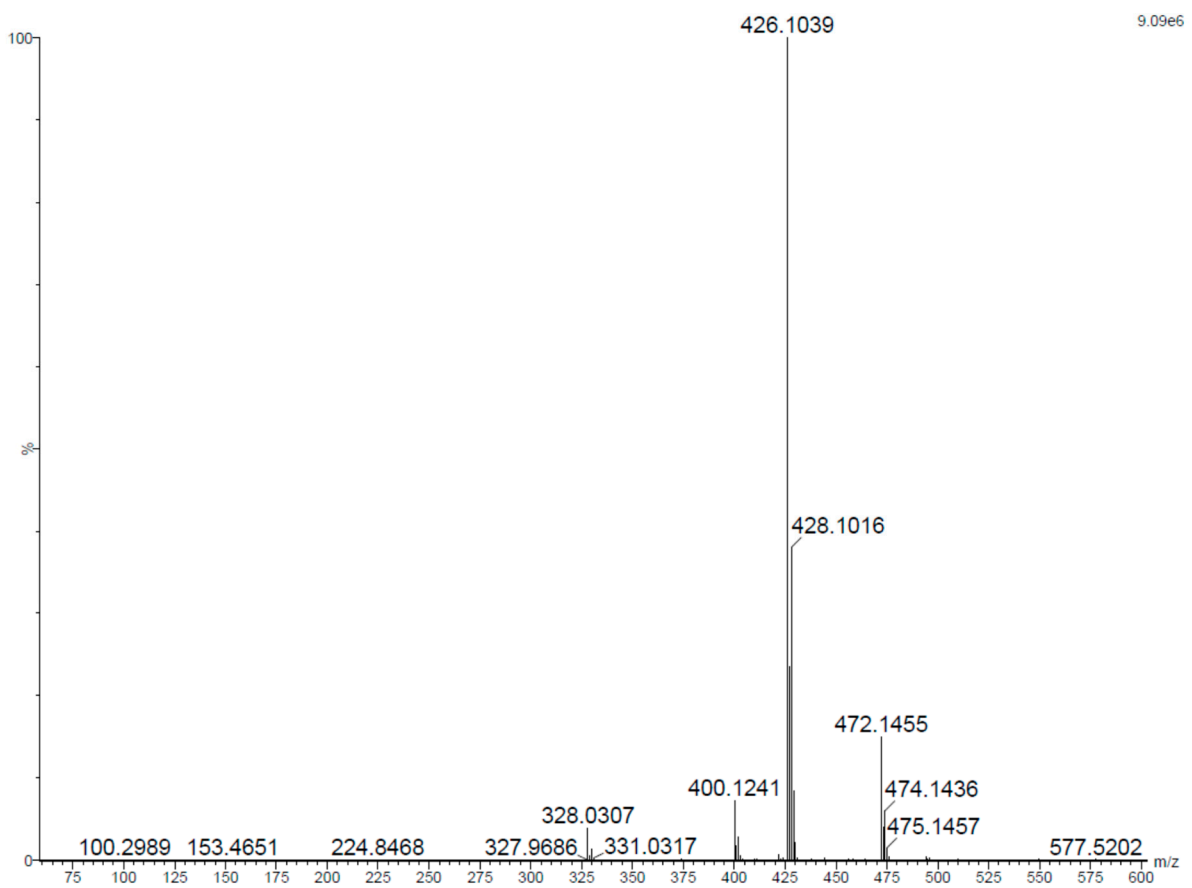

# Product 3b

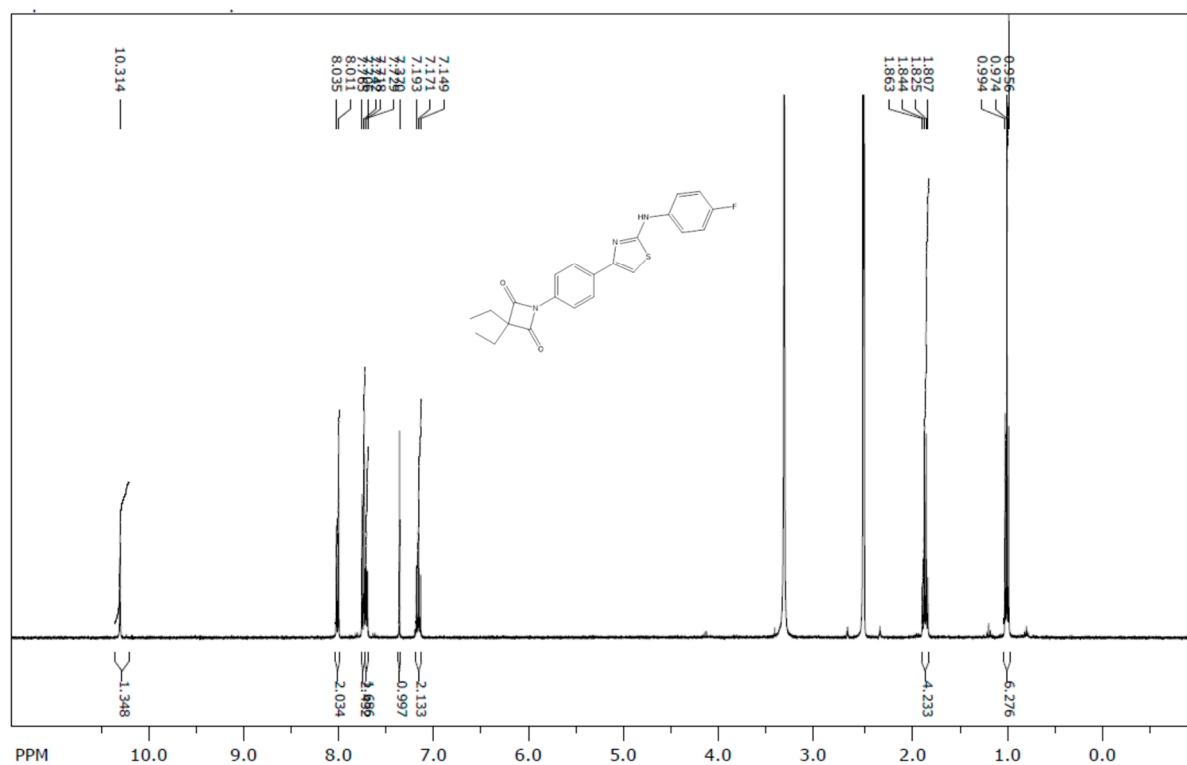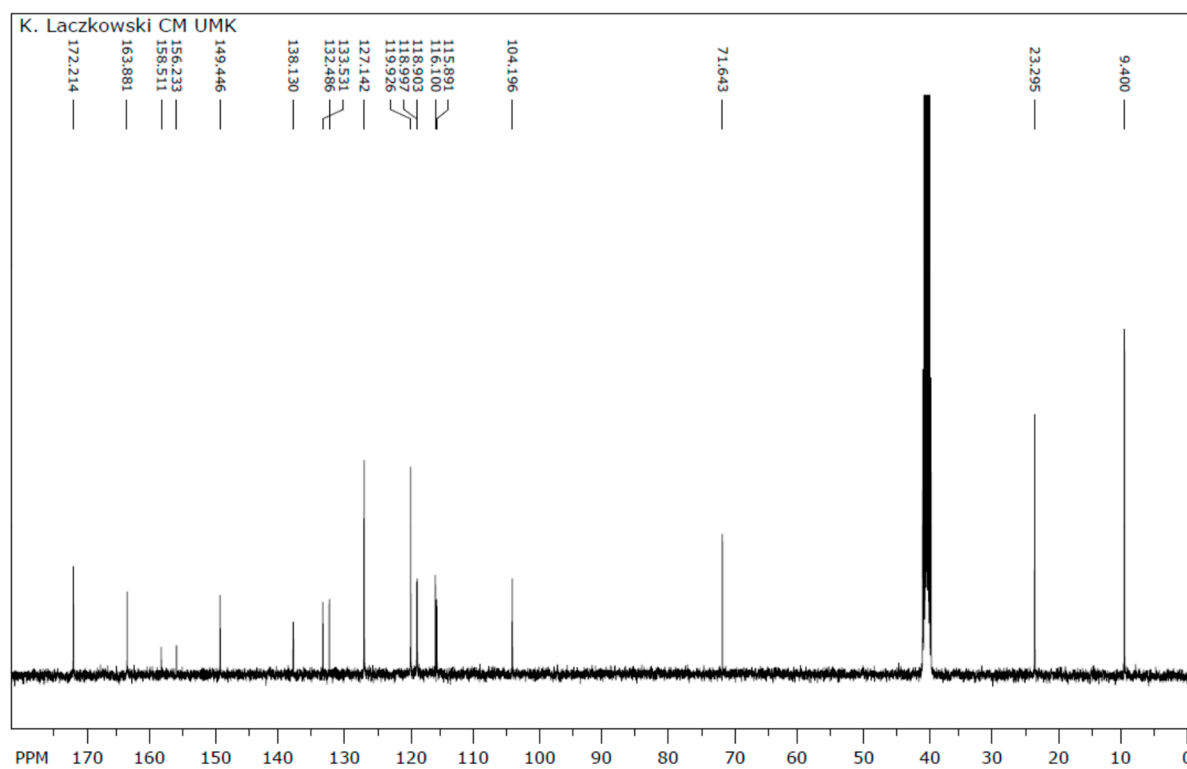

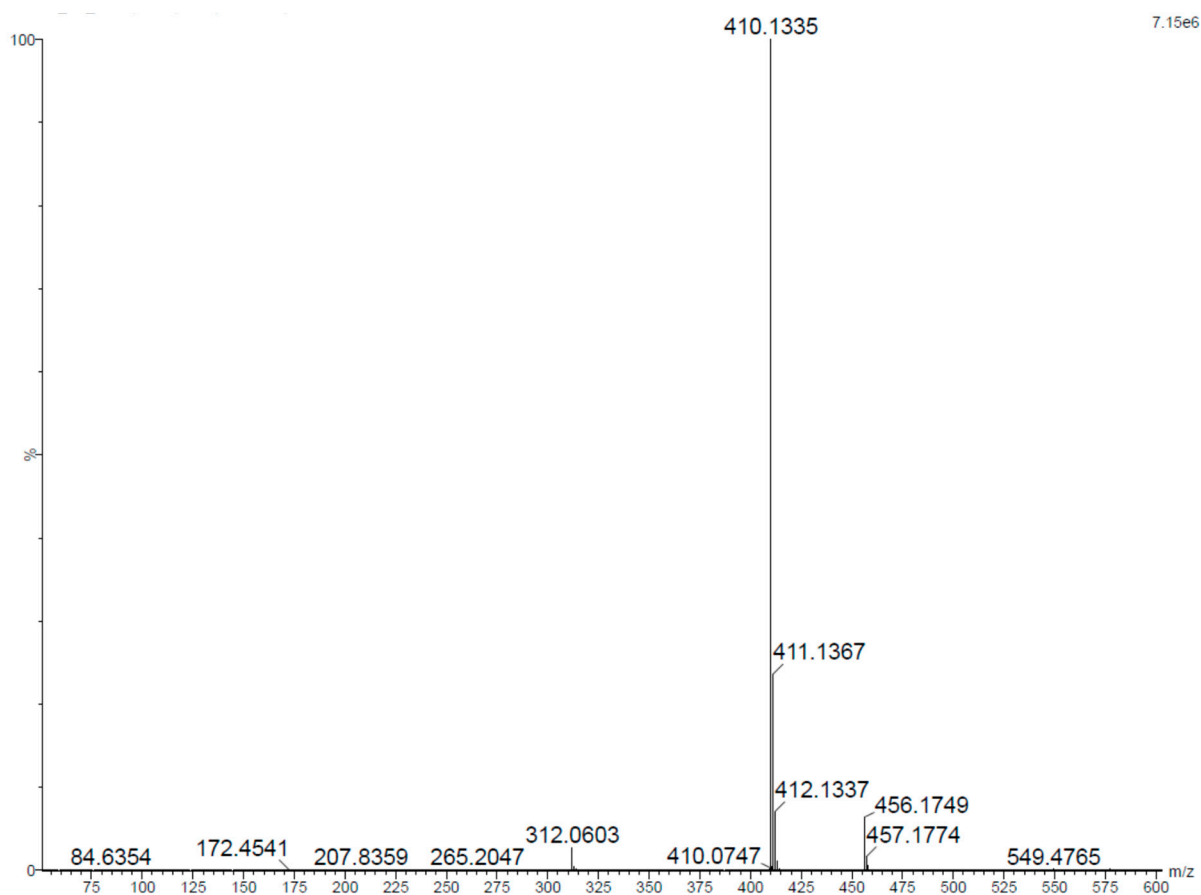

### Product 3c

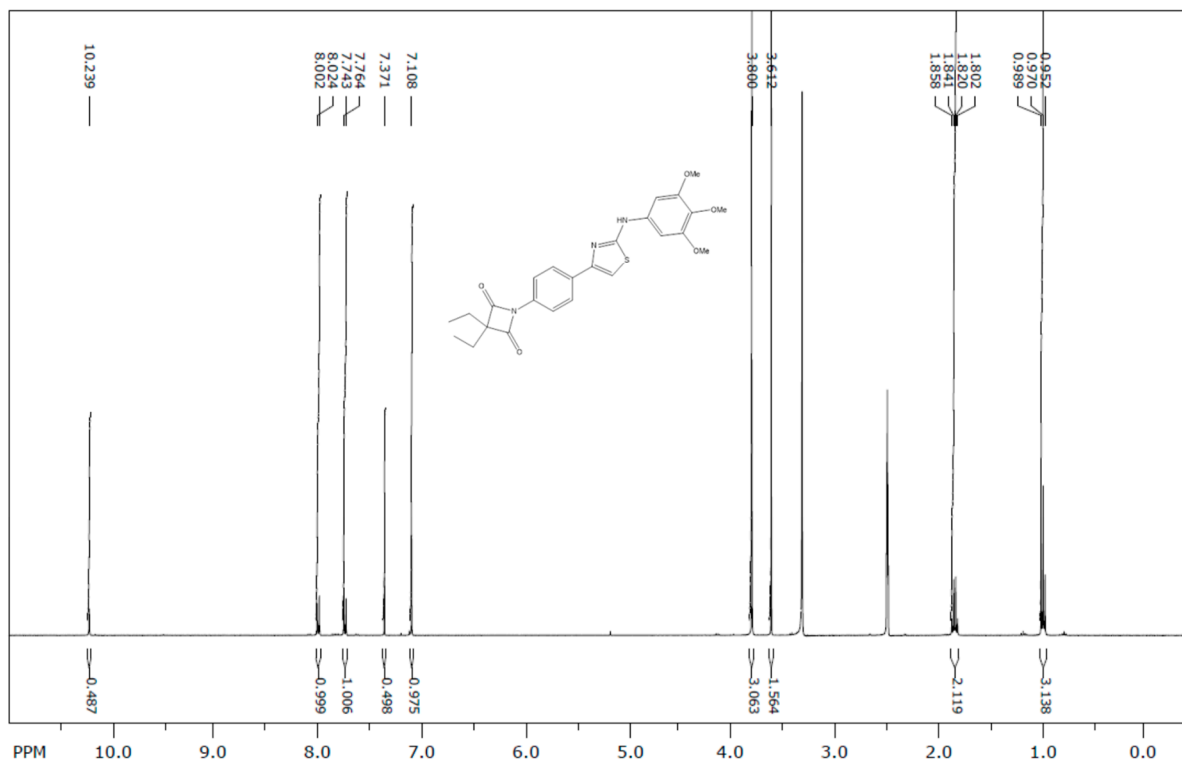

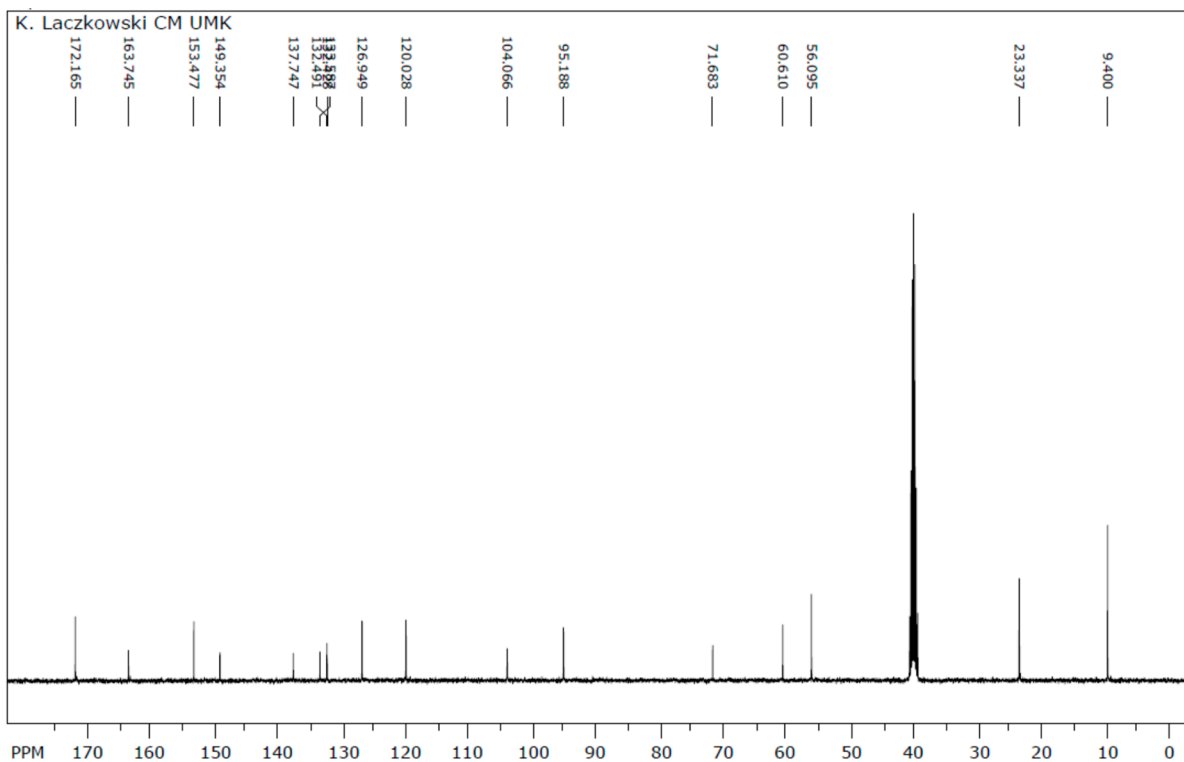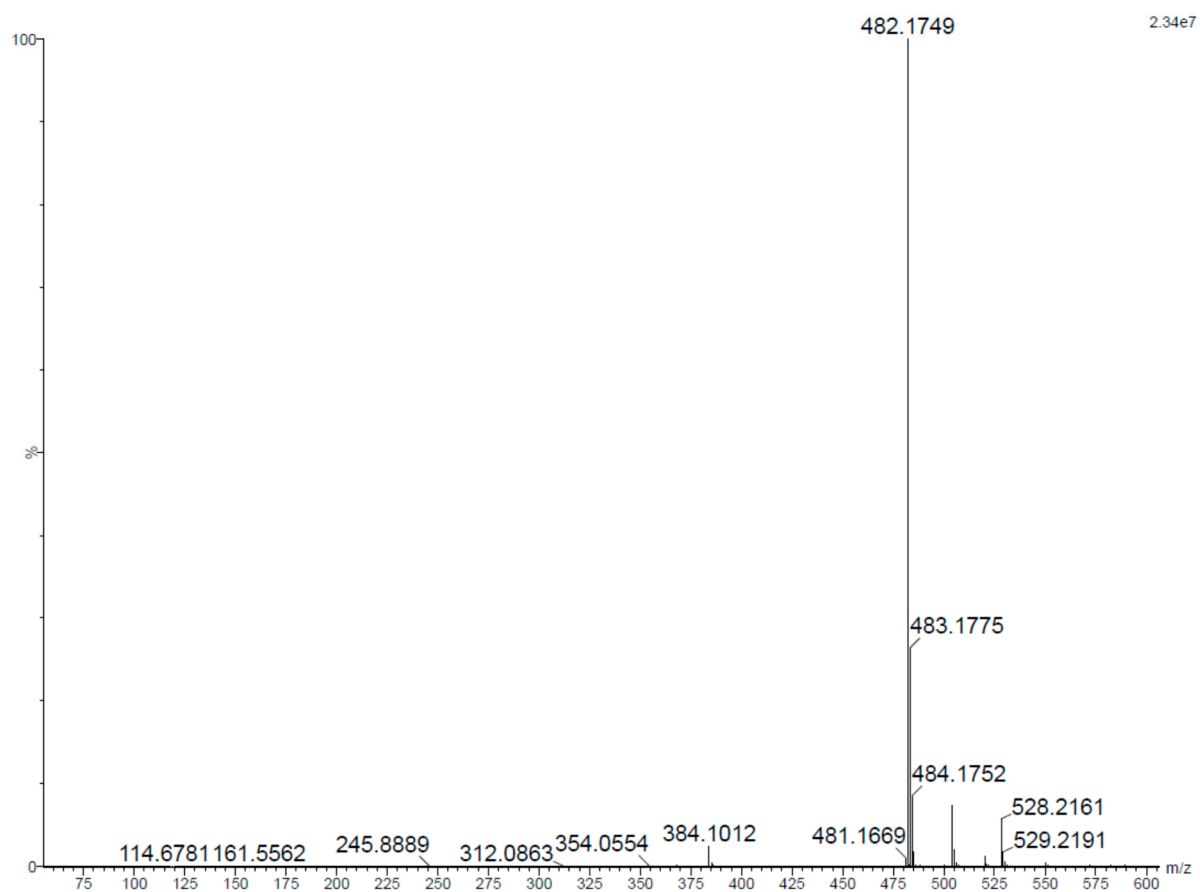

# Product 3d

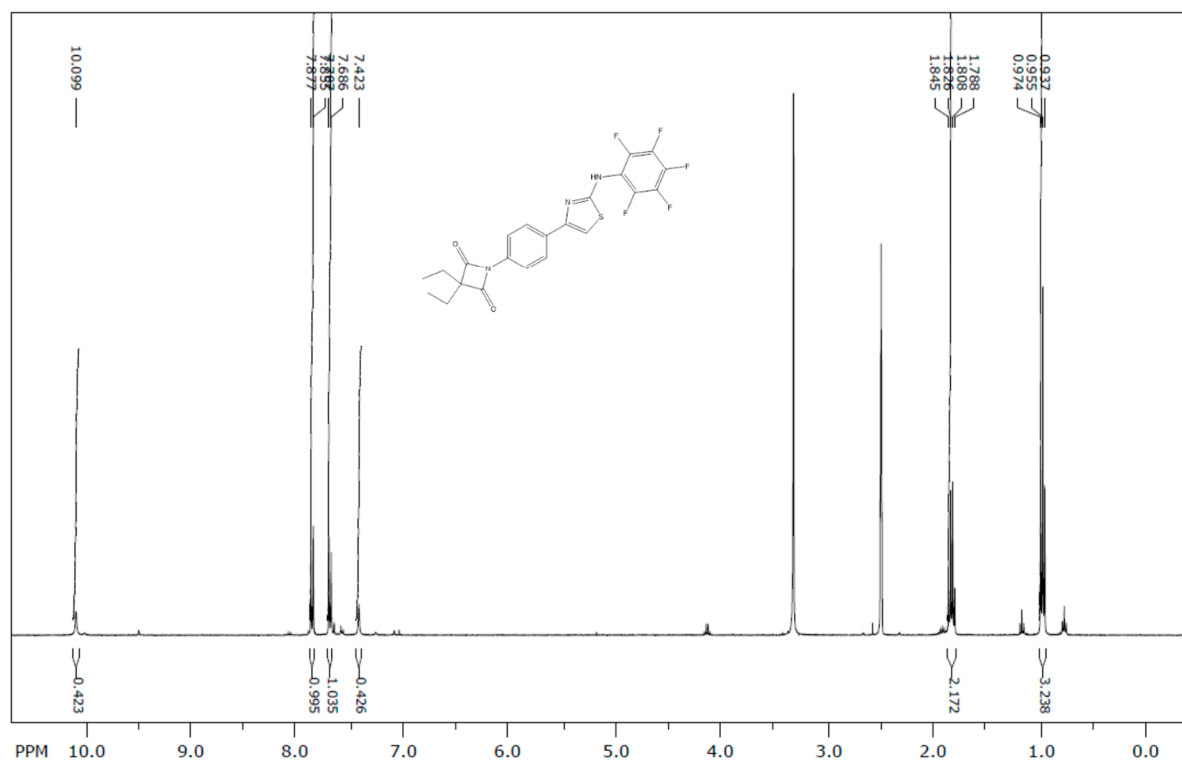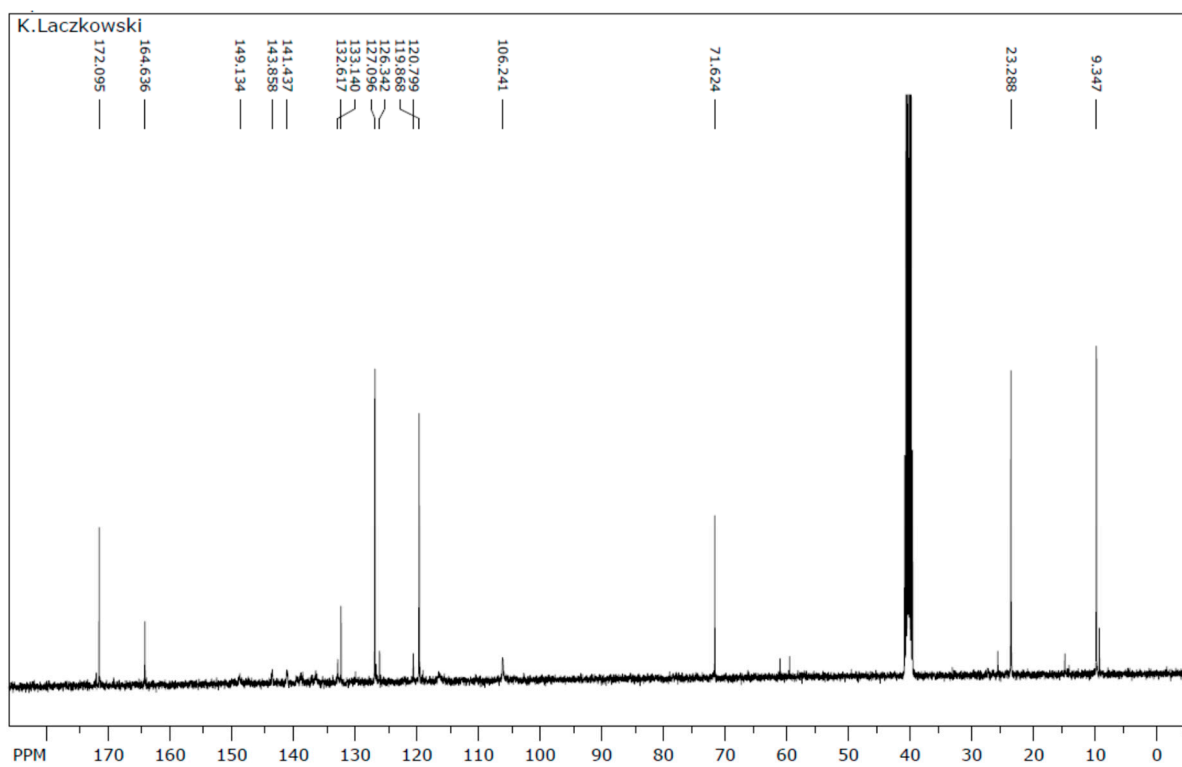

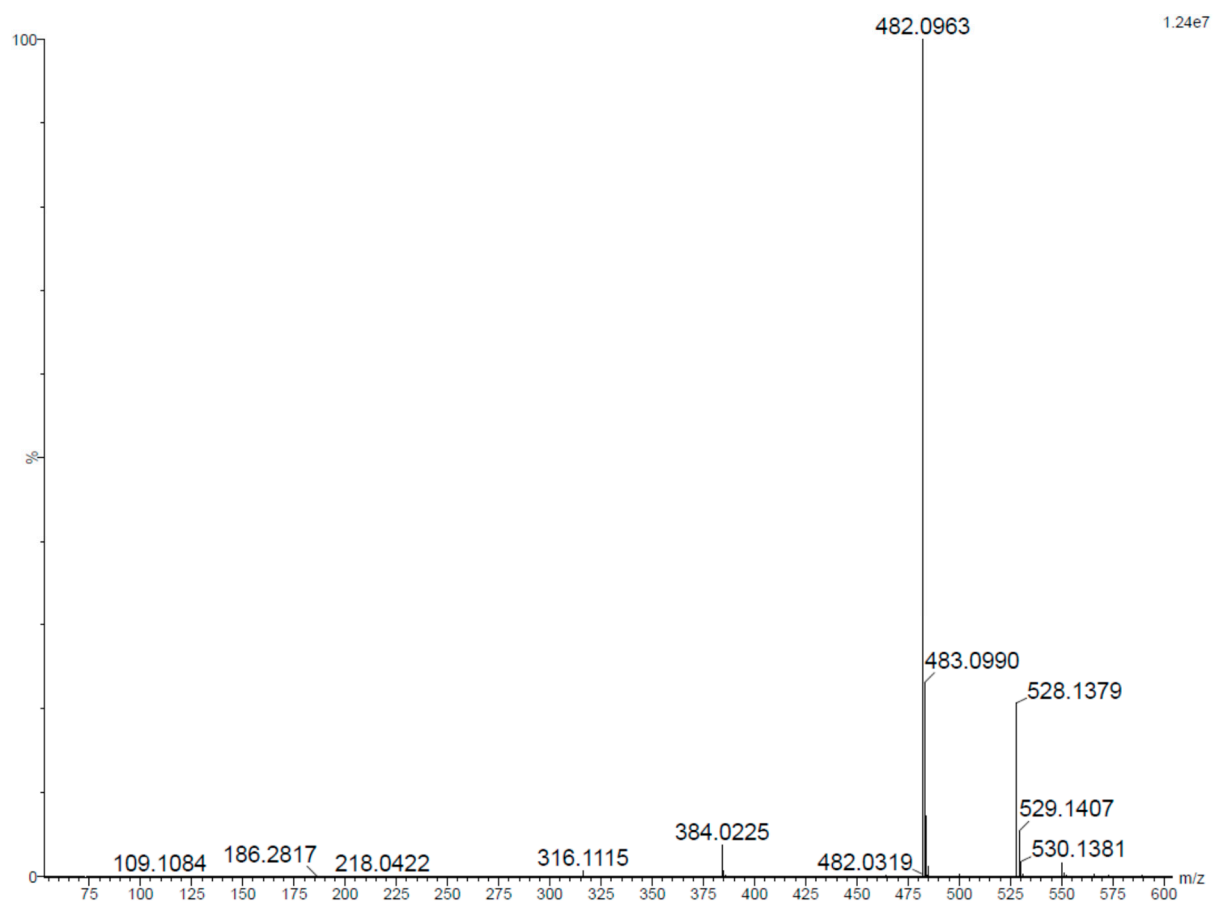

**Product 3e**

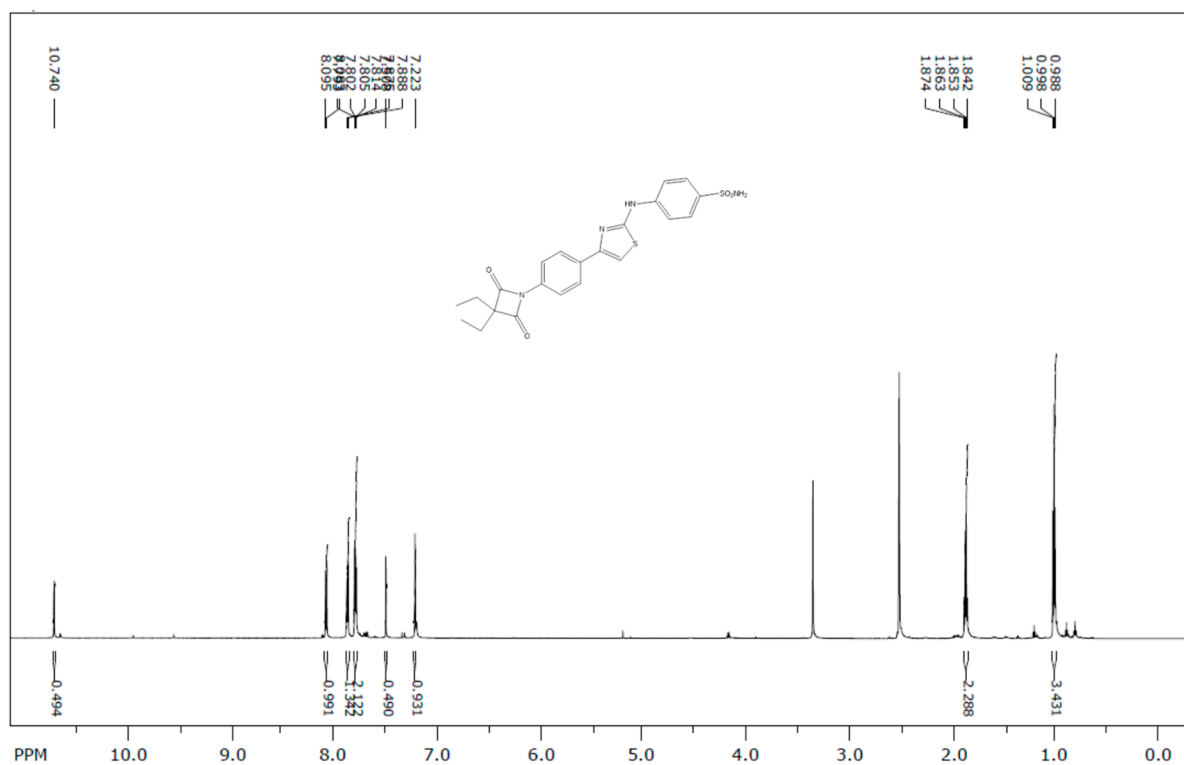



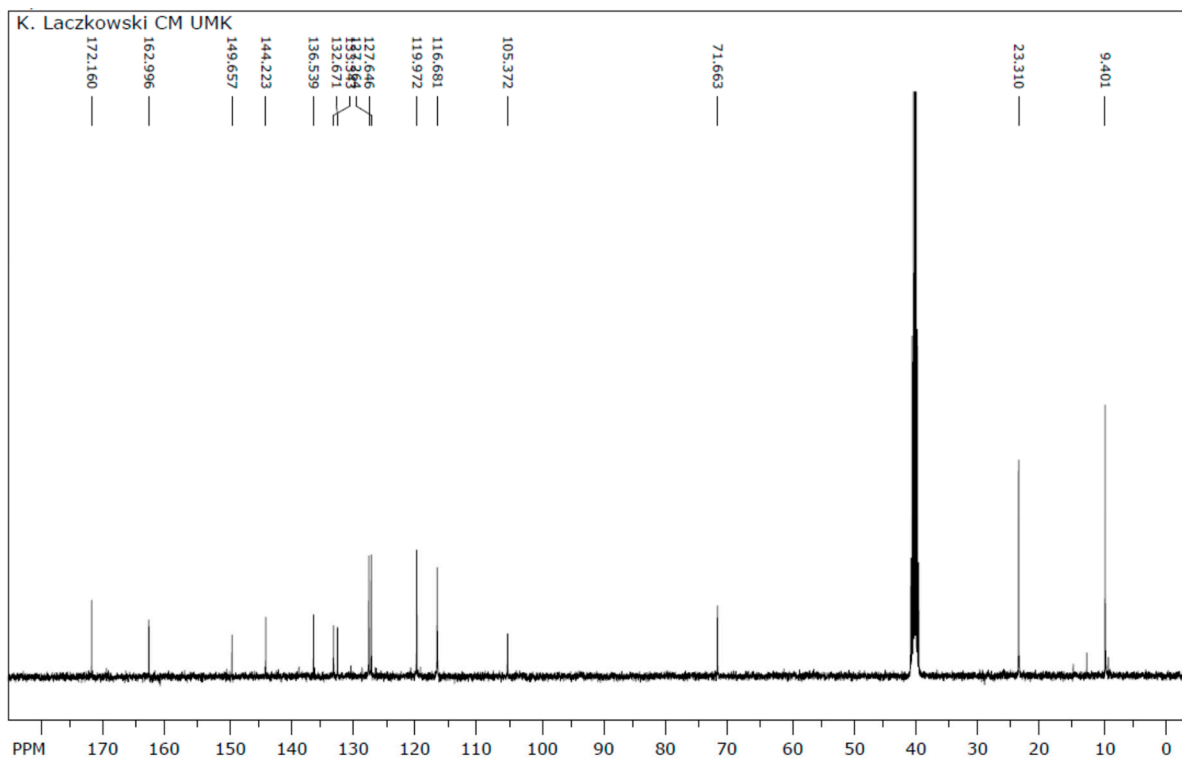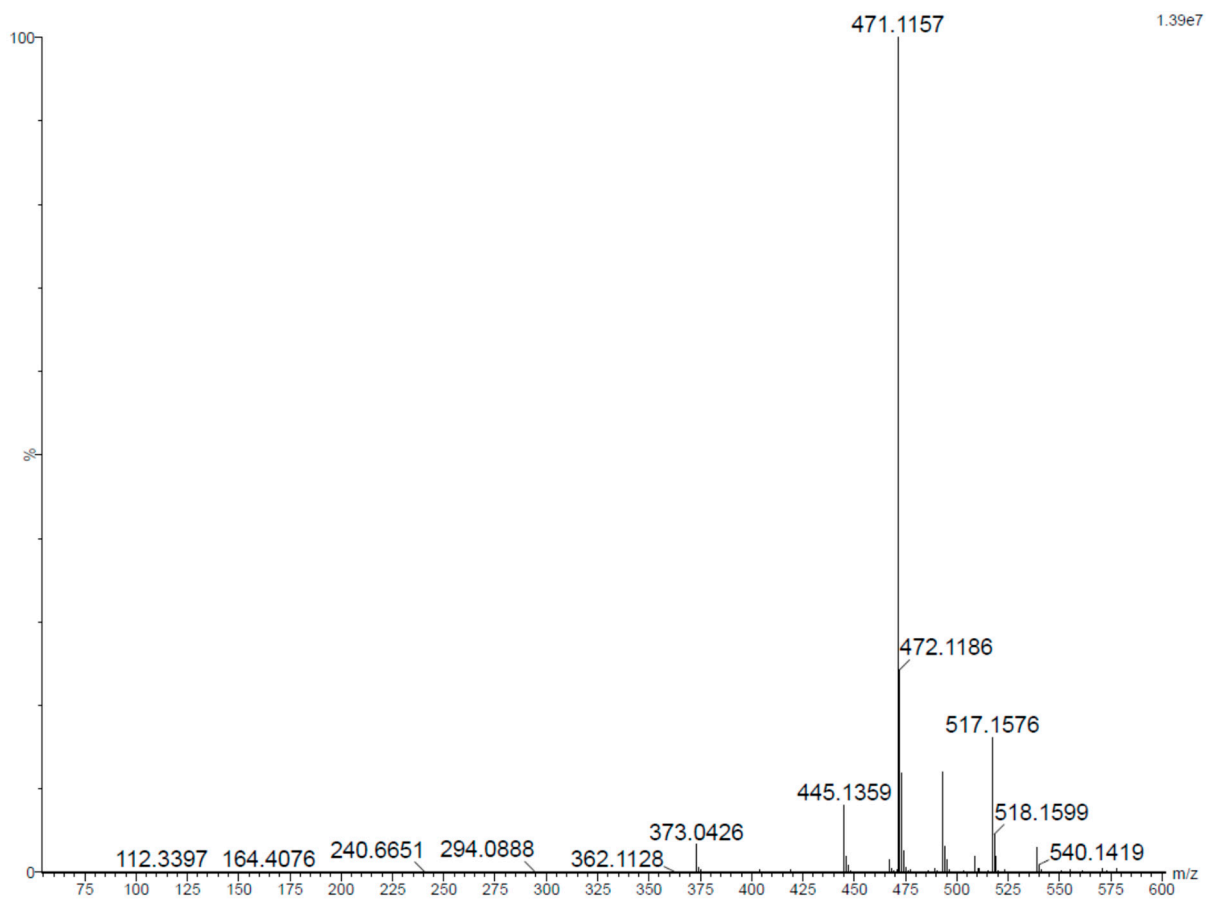

# Product 3f

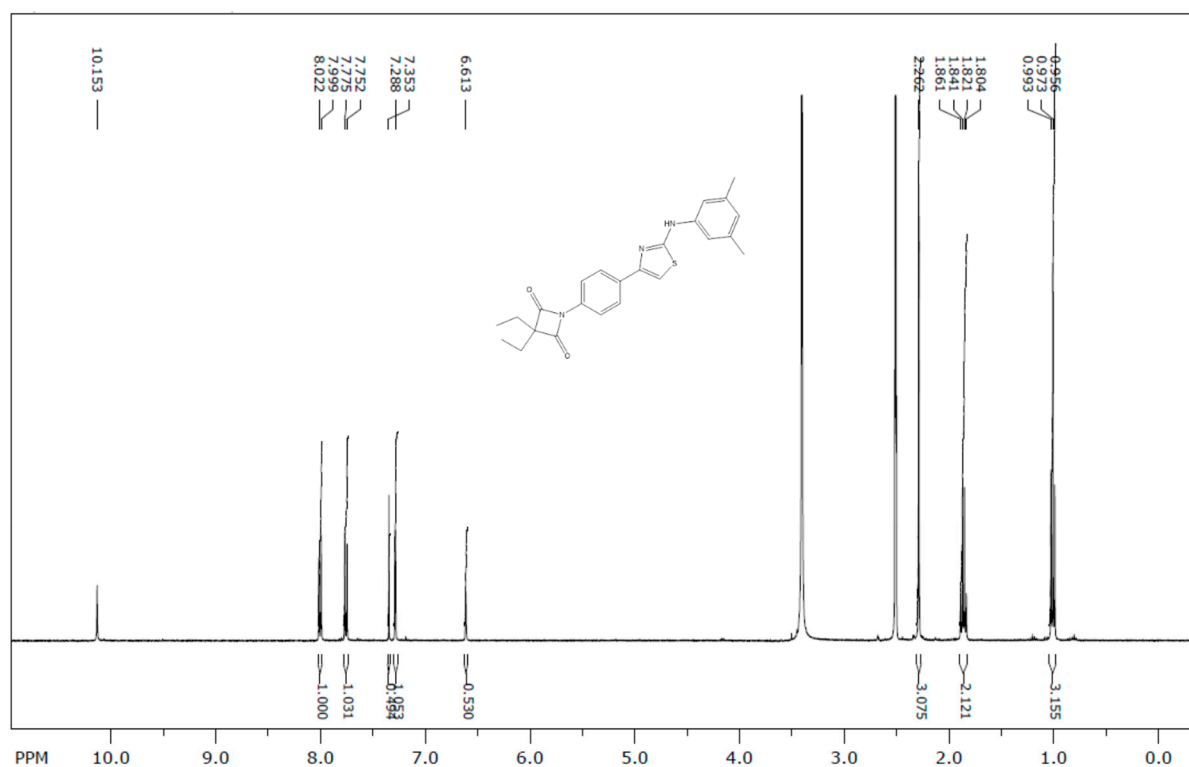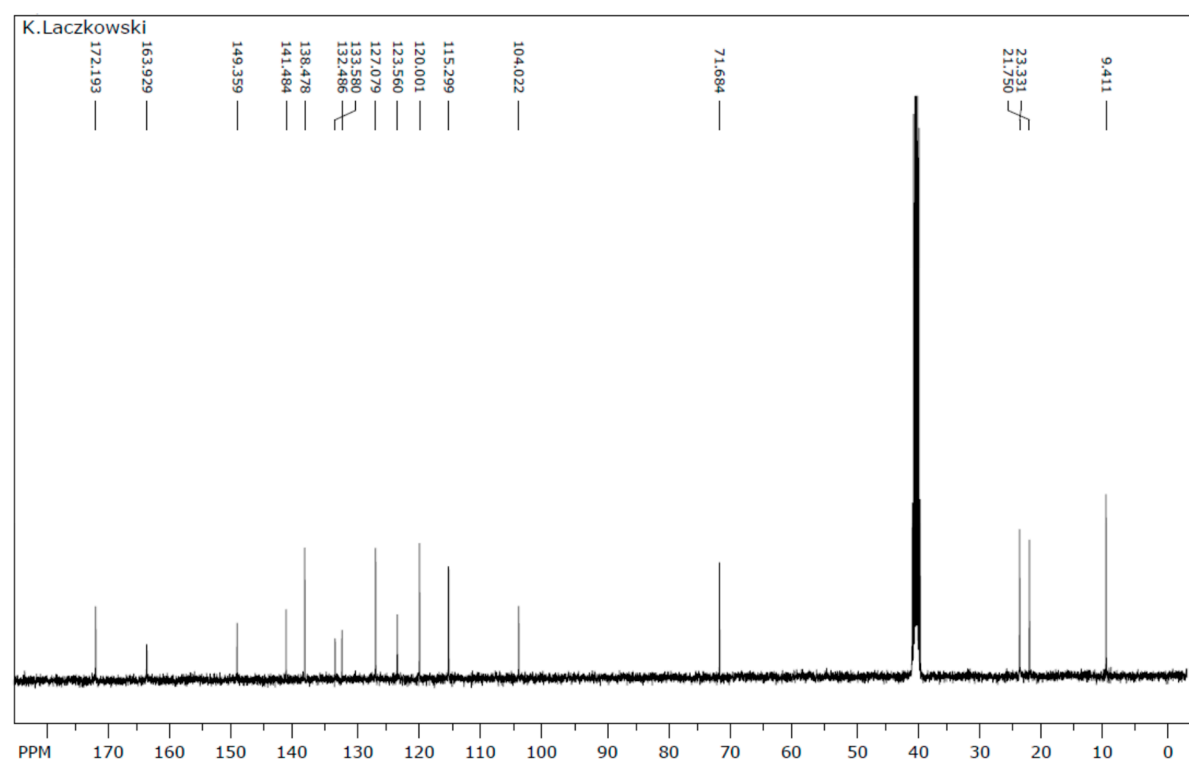

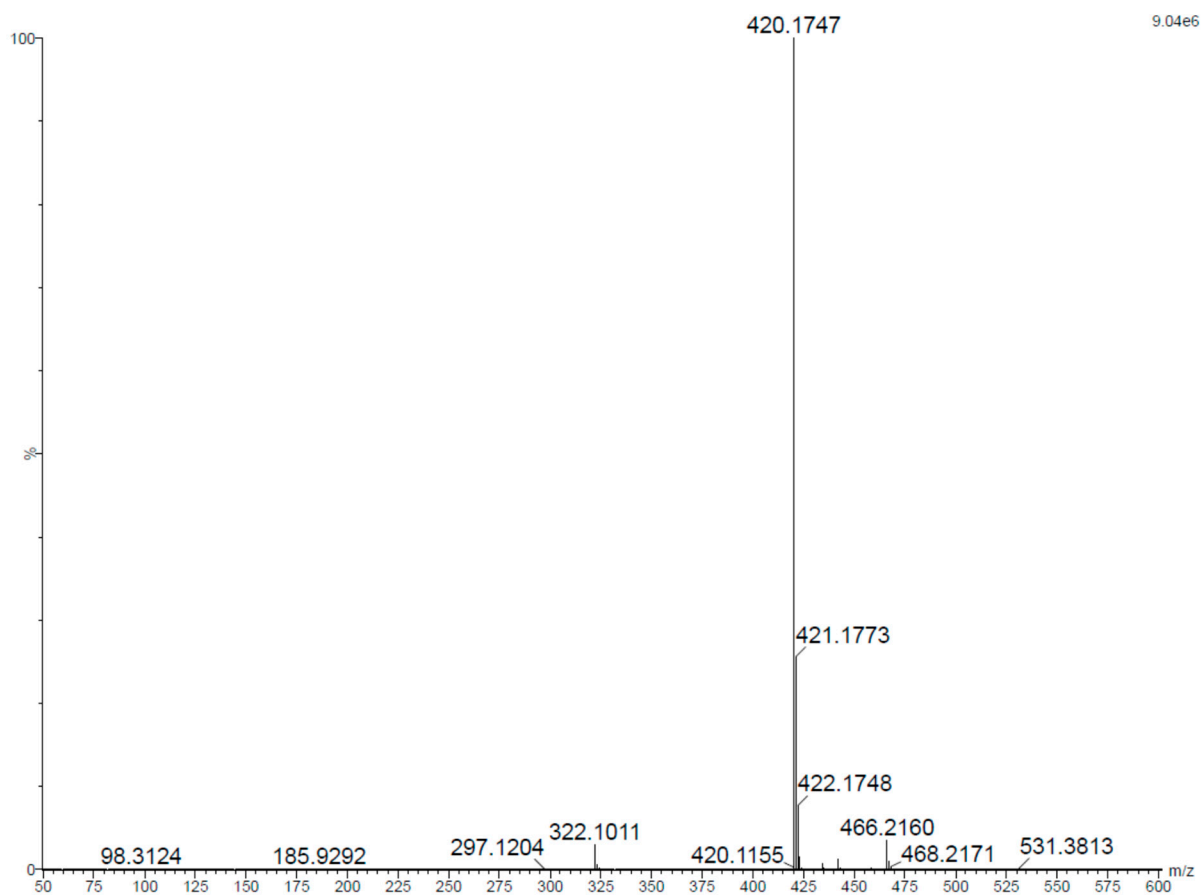

**Product 3g**

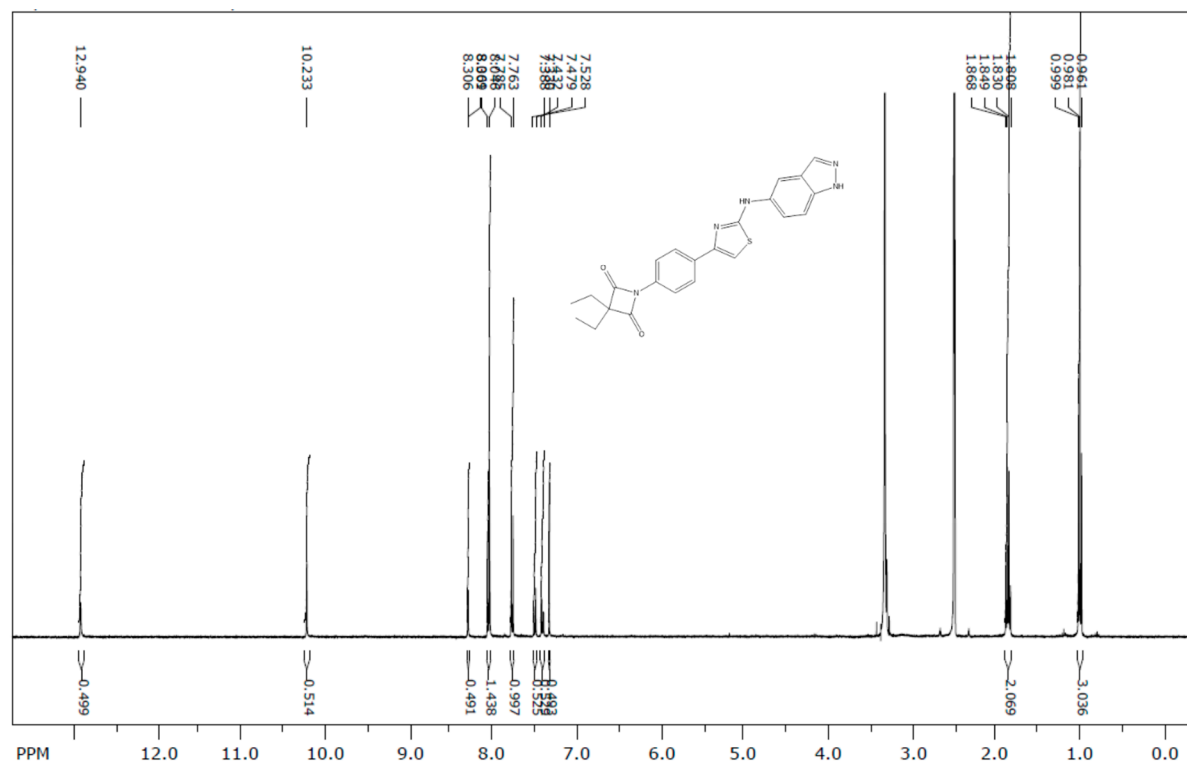

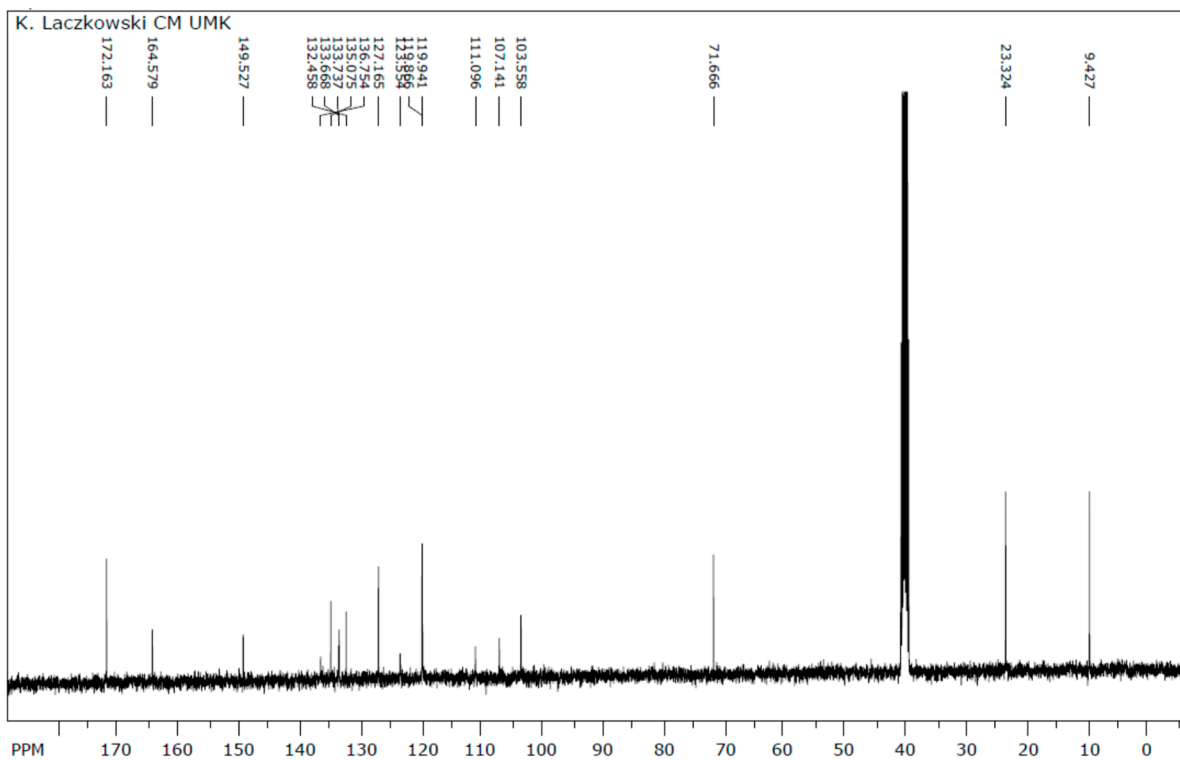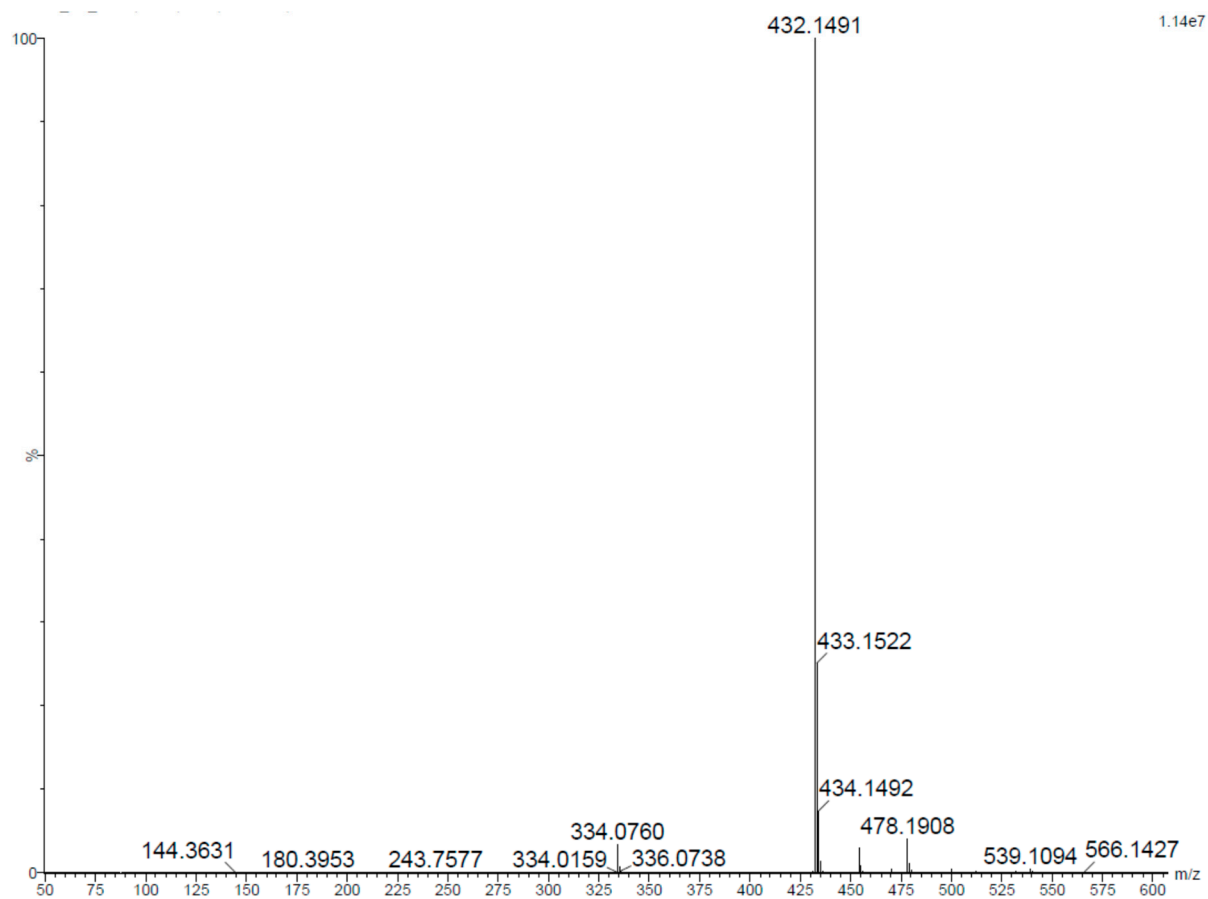

# Product 3h

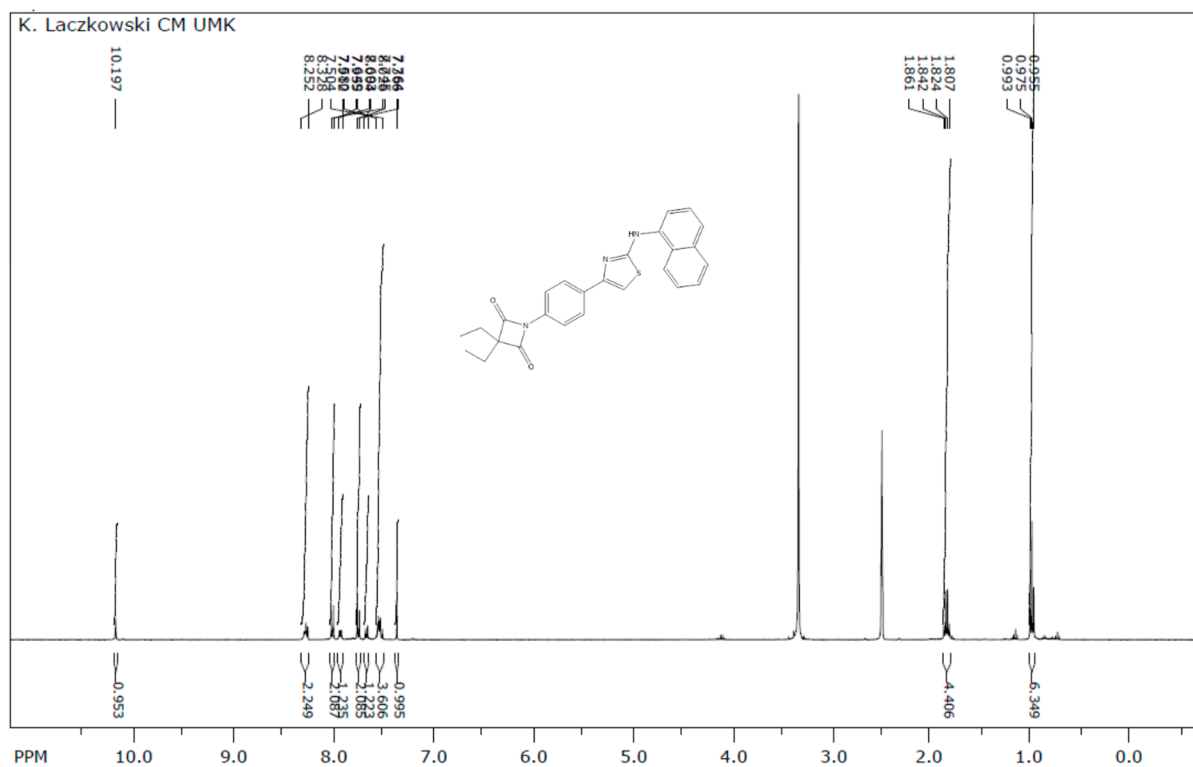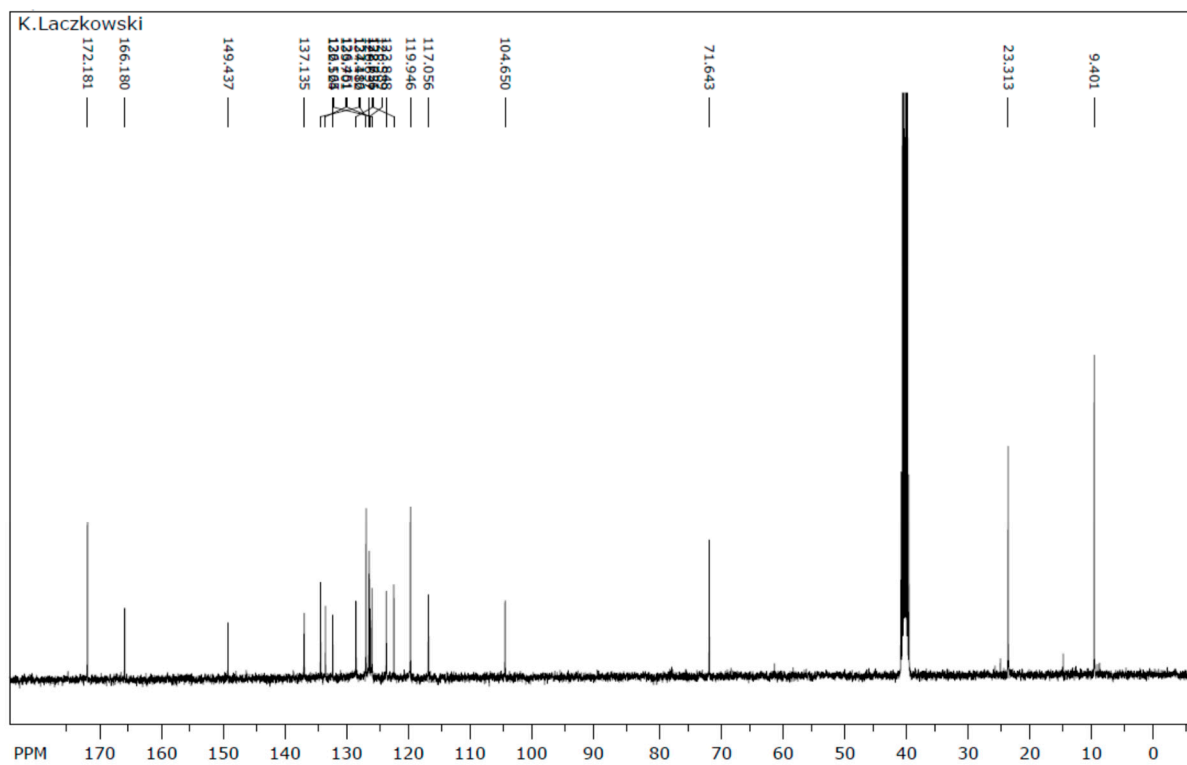

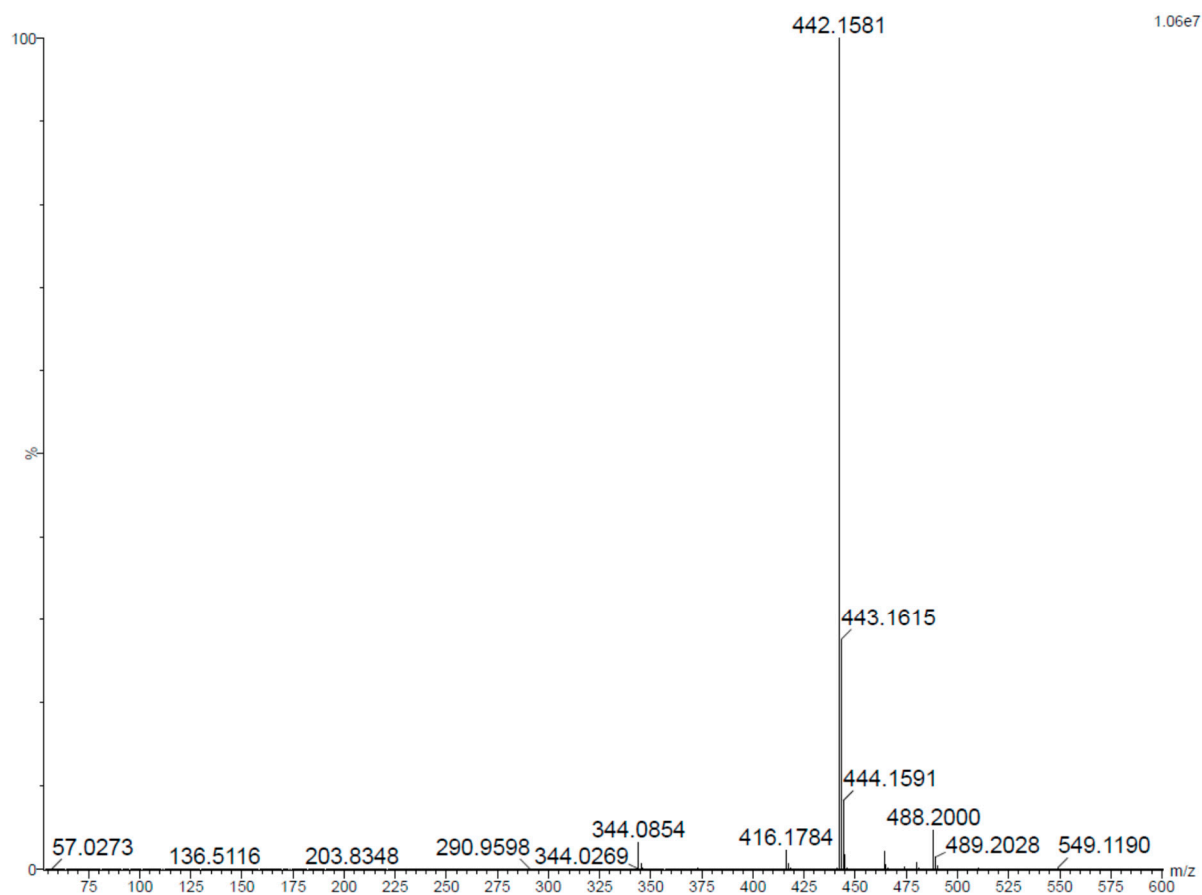

### Product 3i

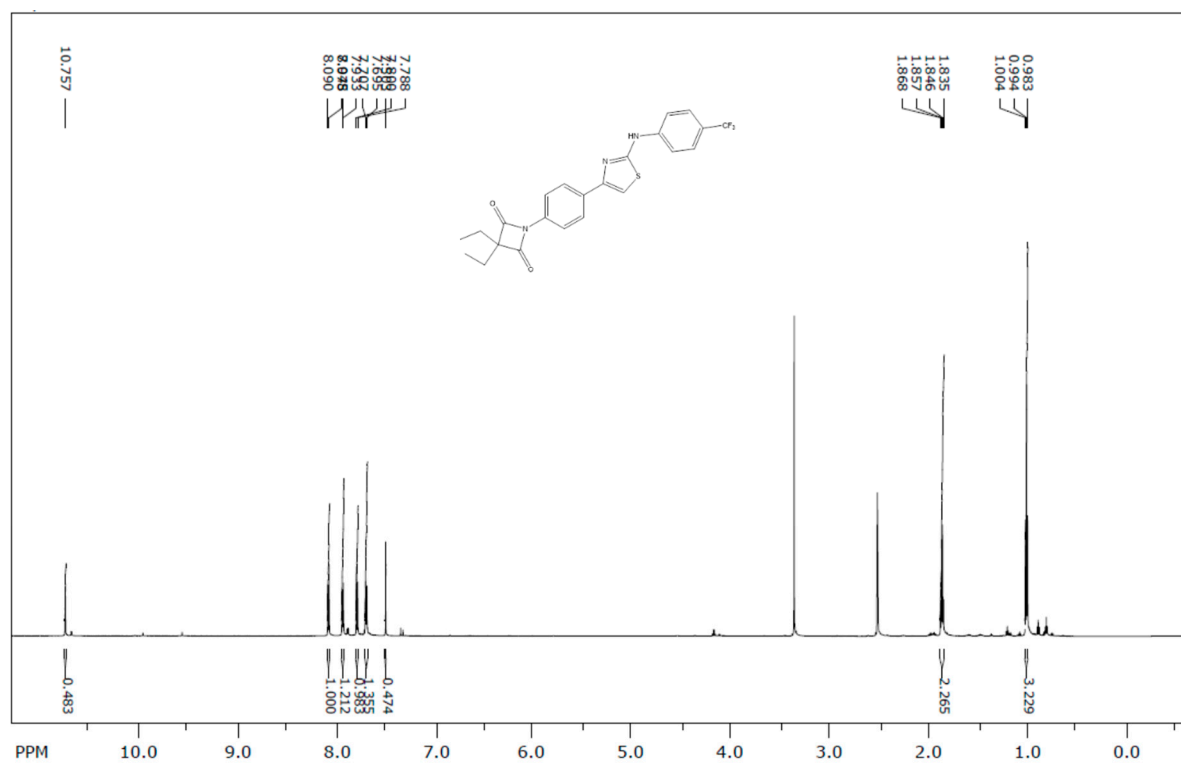

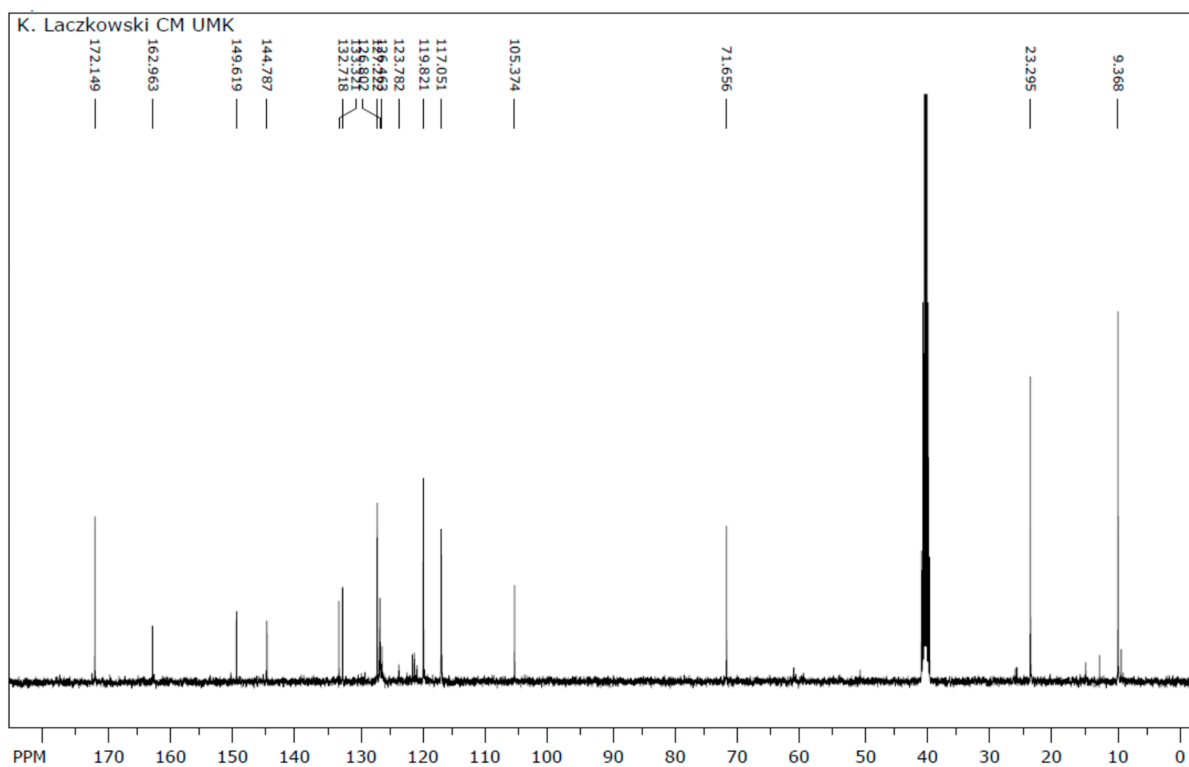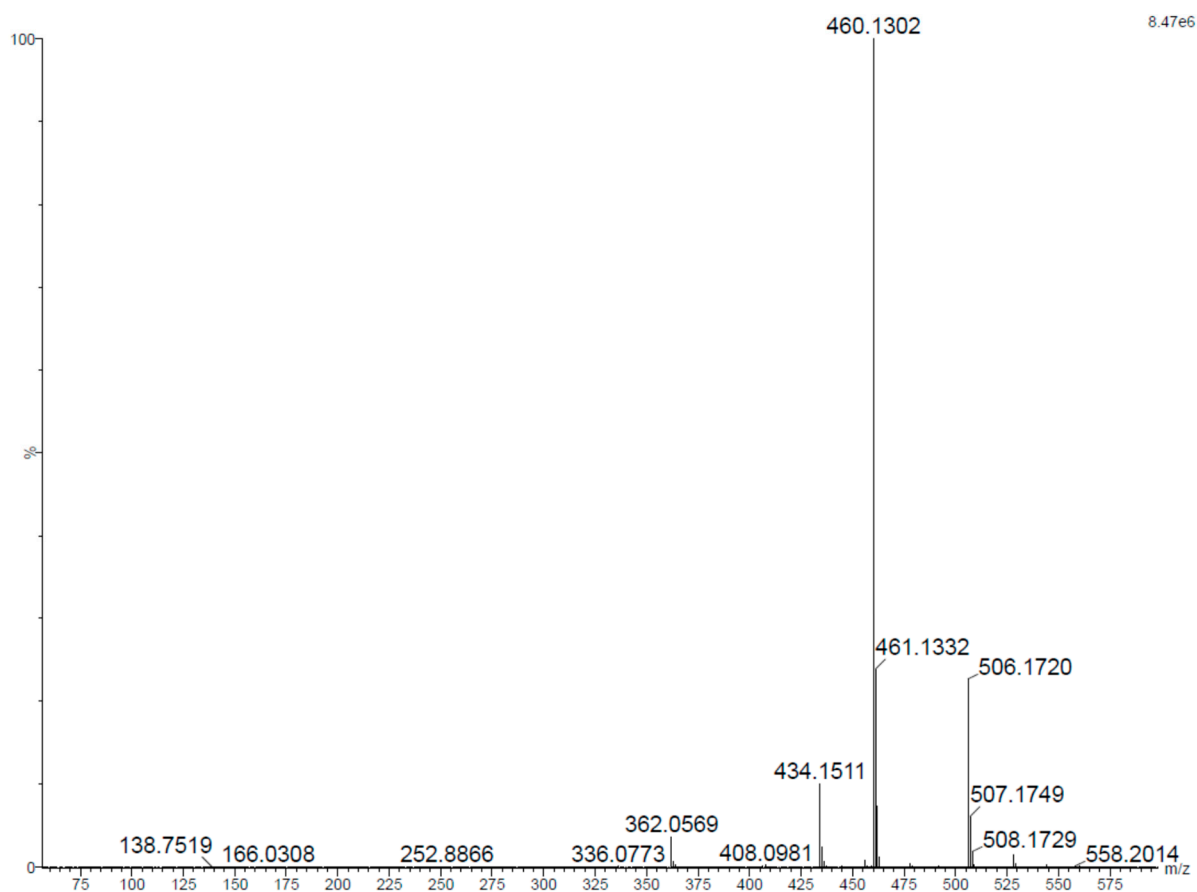

# Product 3j

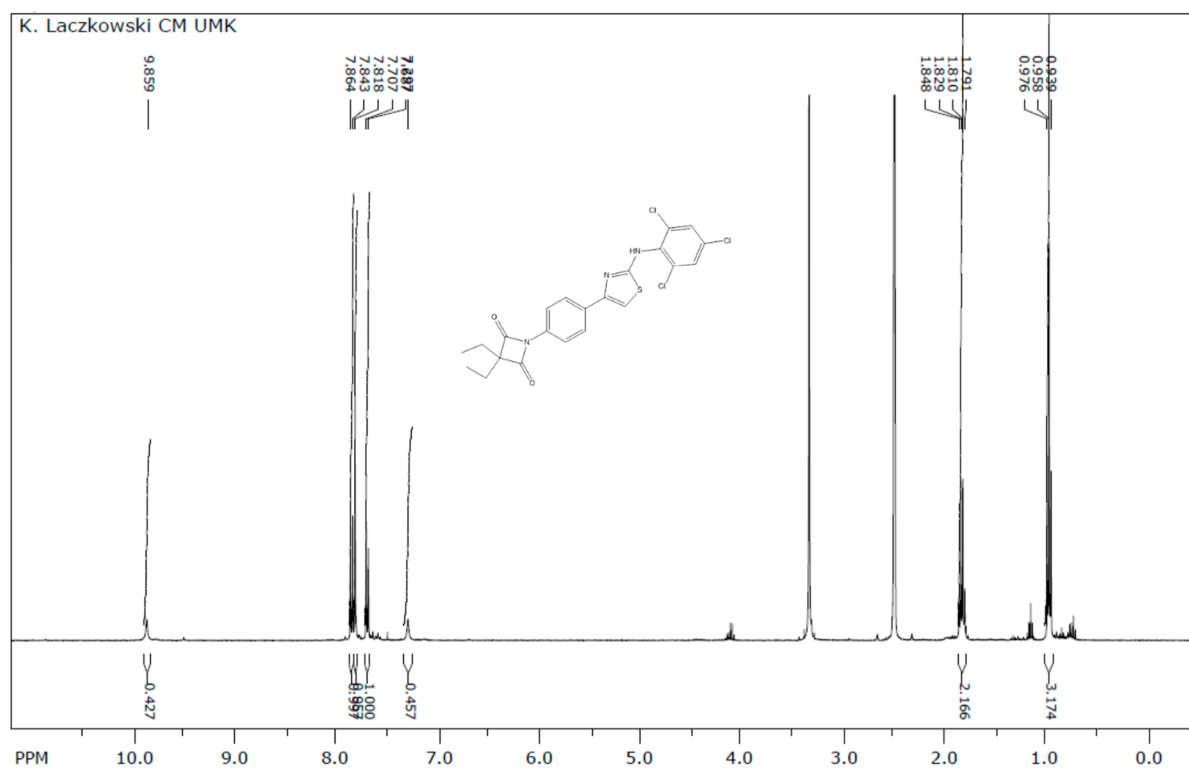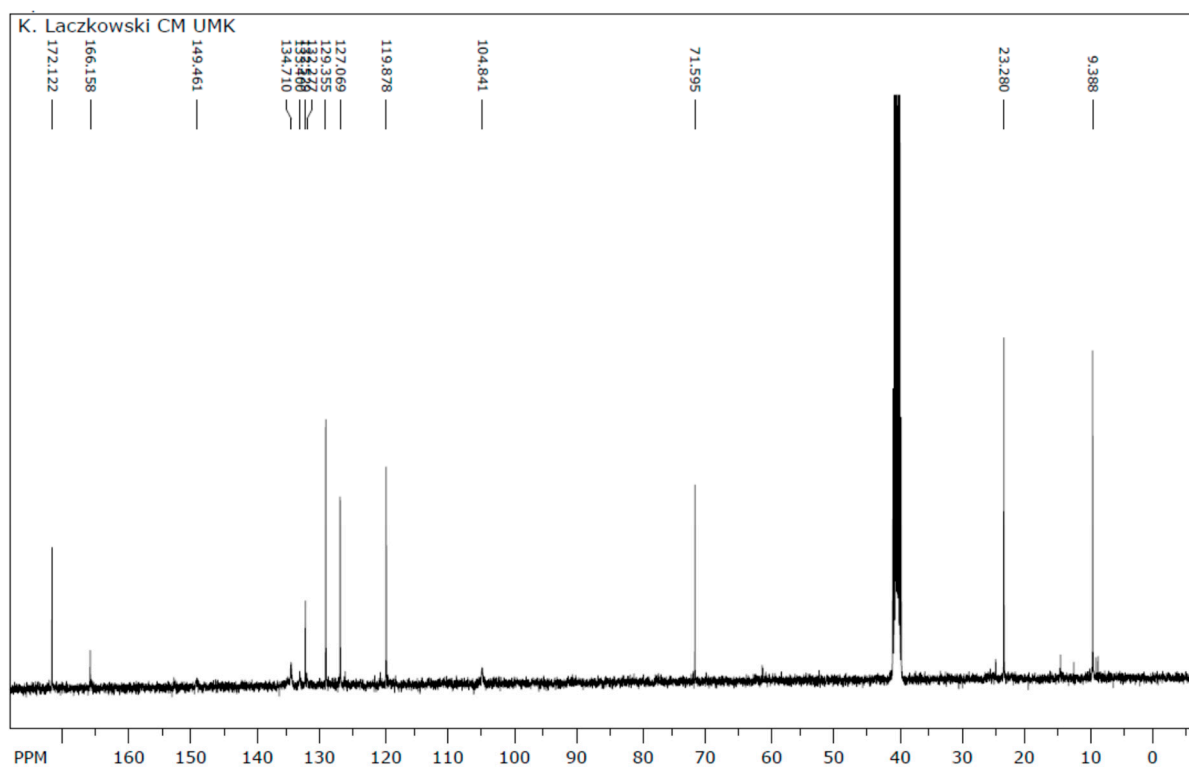



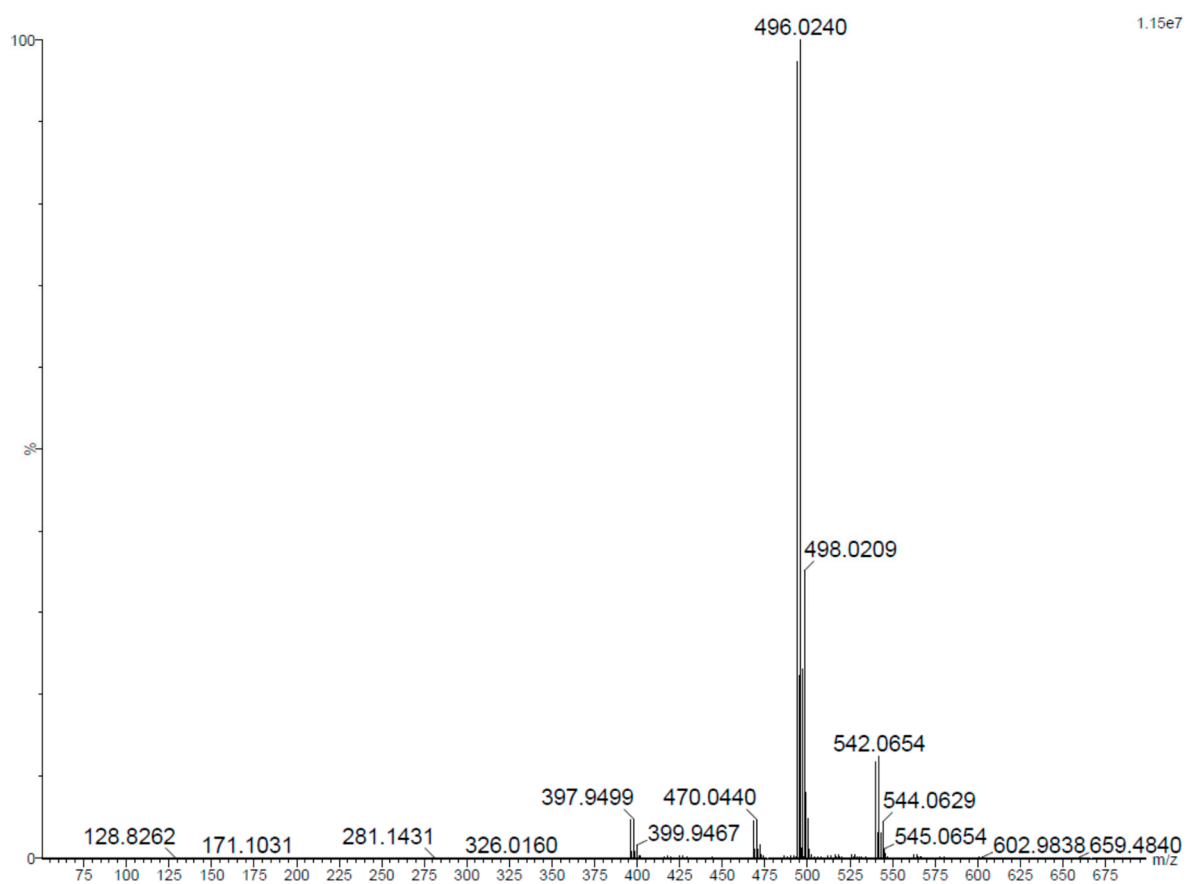

Supplement: s1 [file s1]
